# Supplementary material for: Species-specific sensitivity to TGFβ signaling and changes to the Mmp13 promoter underlie avian jaw development and evolution
Source: PubMed Central journal article supplement (PMC9246370; doi:10.7554/elife.66005), 2022-06-06

Chameleon Duo Ladder

C31

Q31

D31

C34

Q34

D34

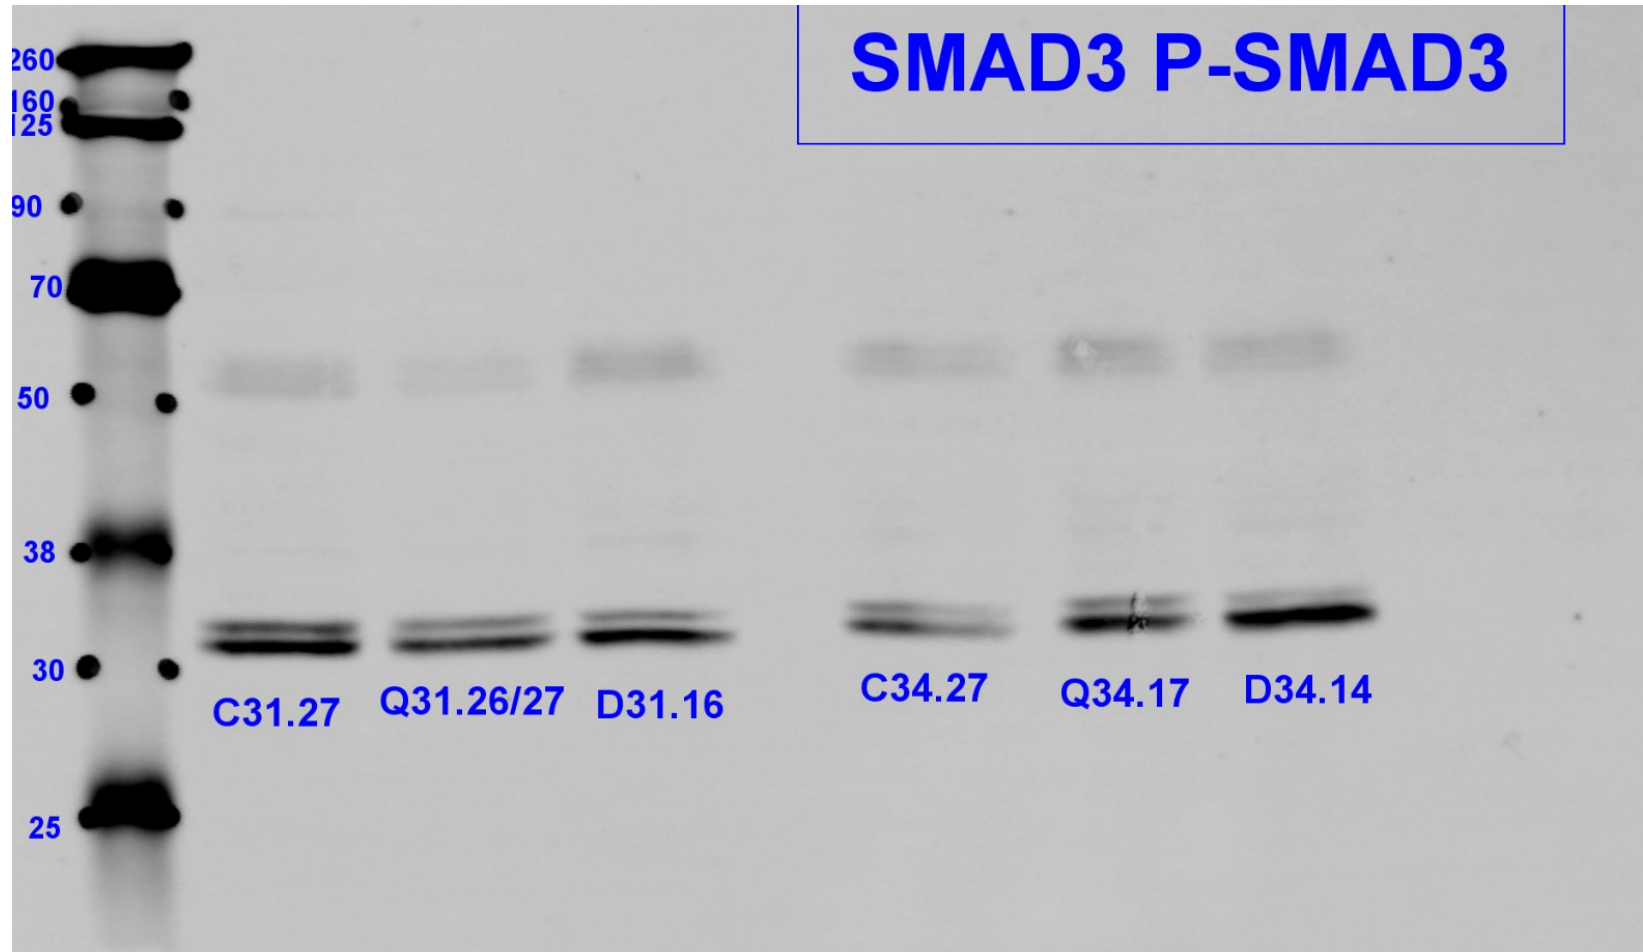

# Figure 2-figure supplement 2A-source data 1 ( $\beta$ -Actin)

Chameleon Duo Ladder C31 Q31 D31 C34 Q34 D34

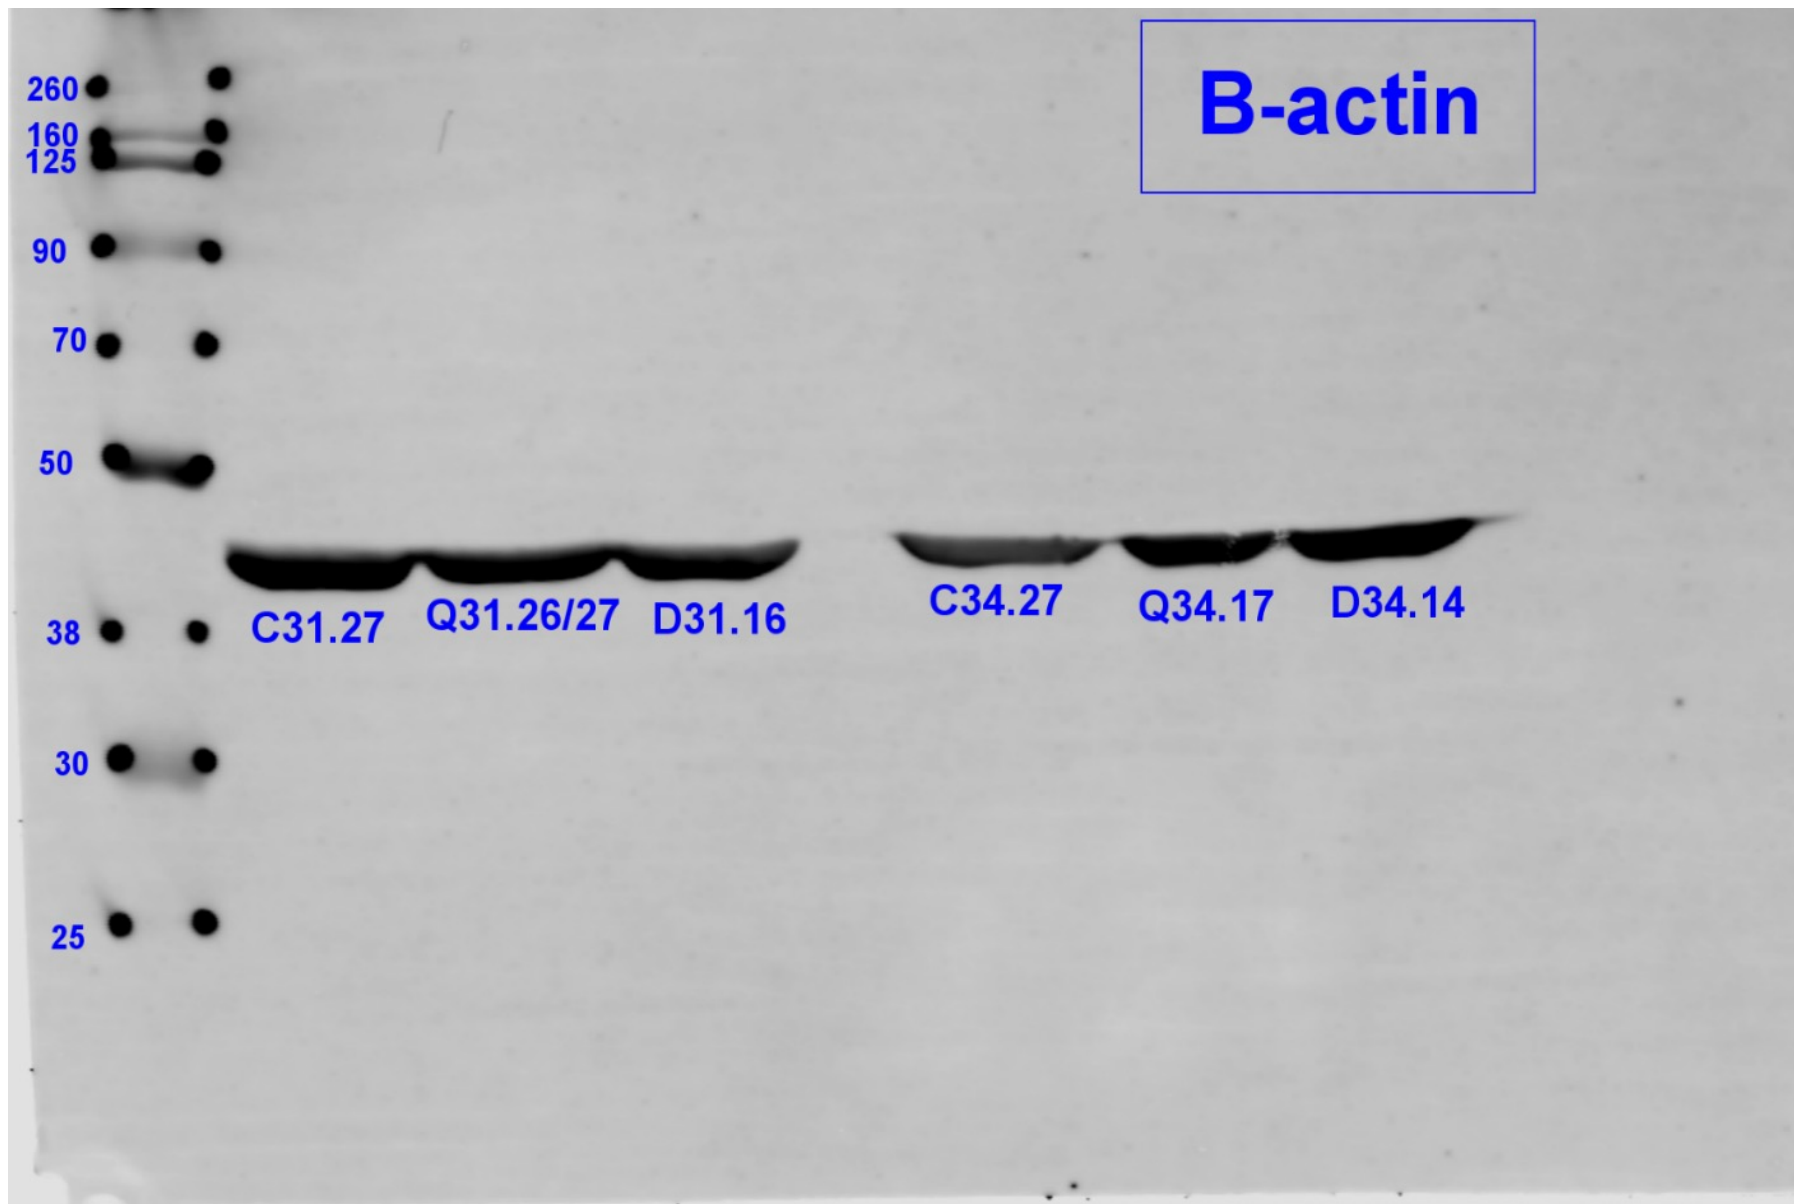

# Figure 2-figure supplement 2A-source data 1 (pSMAD3)

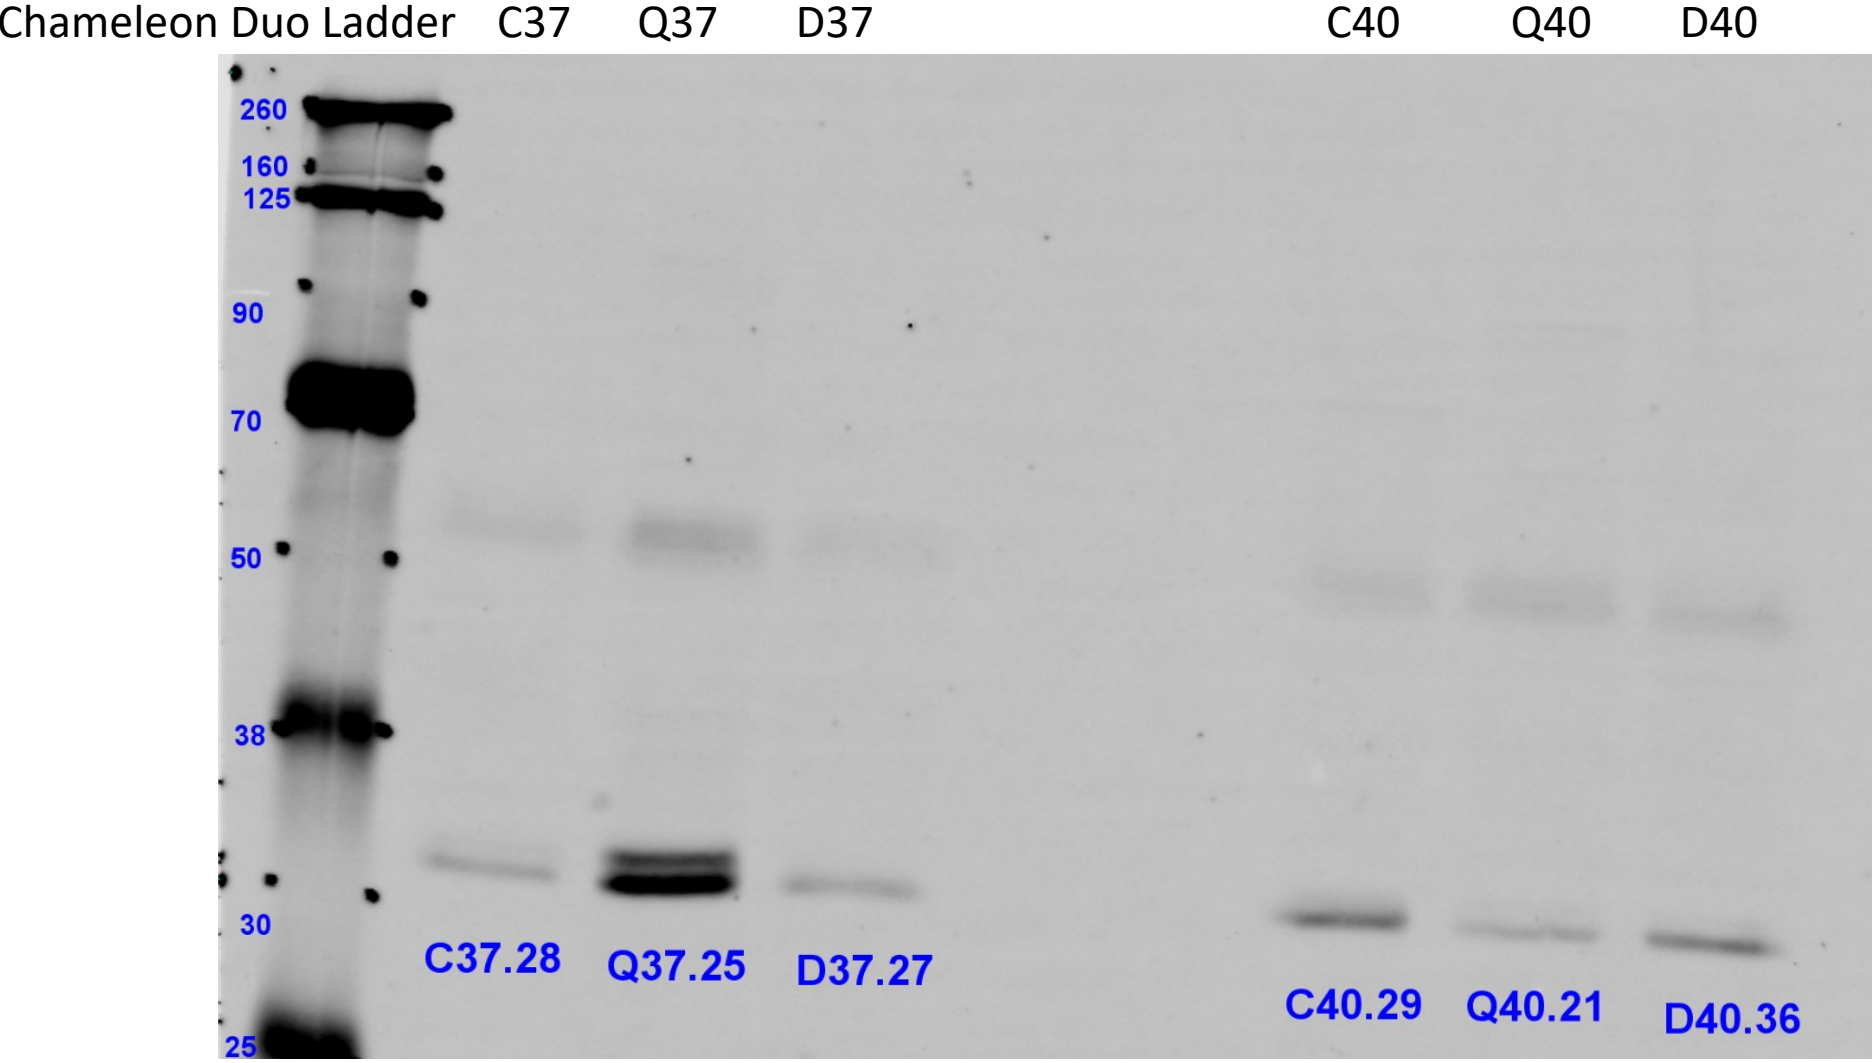

# Figure 2-figure supplement 2A-source data 1 ( $\beta$ -Actin)

Chameleon Duo Ladder C37 Q37 D37 C40 Q40 D40

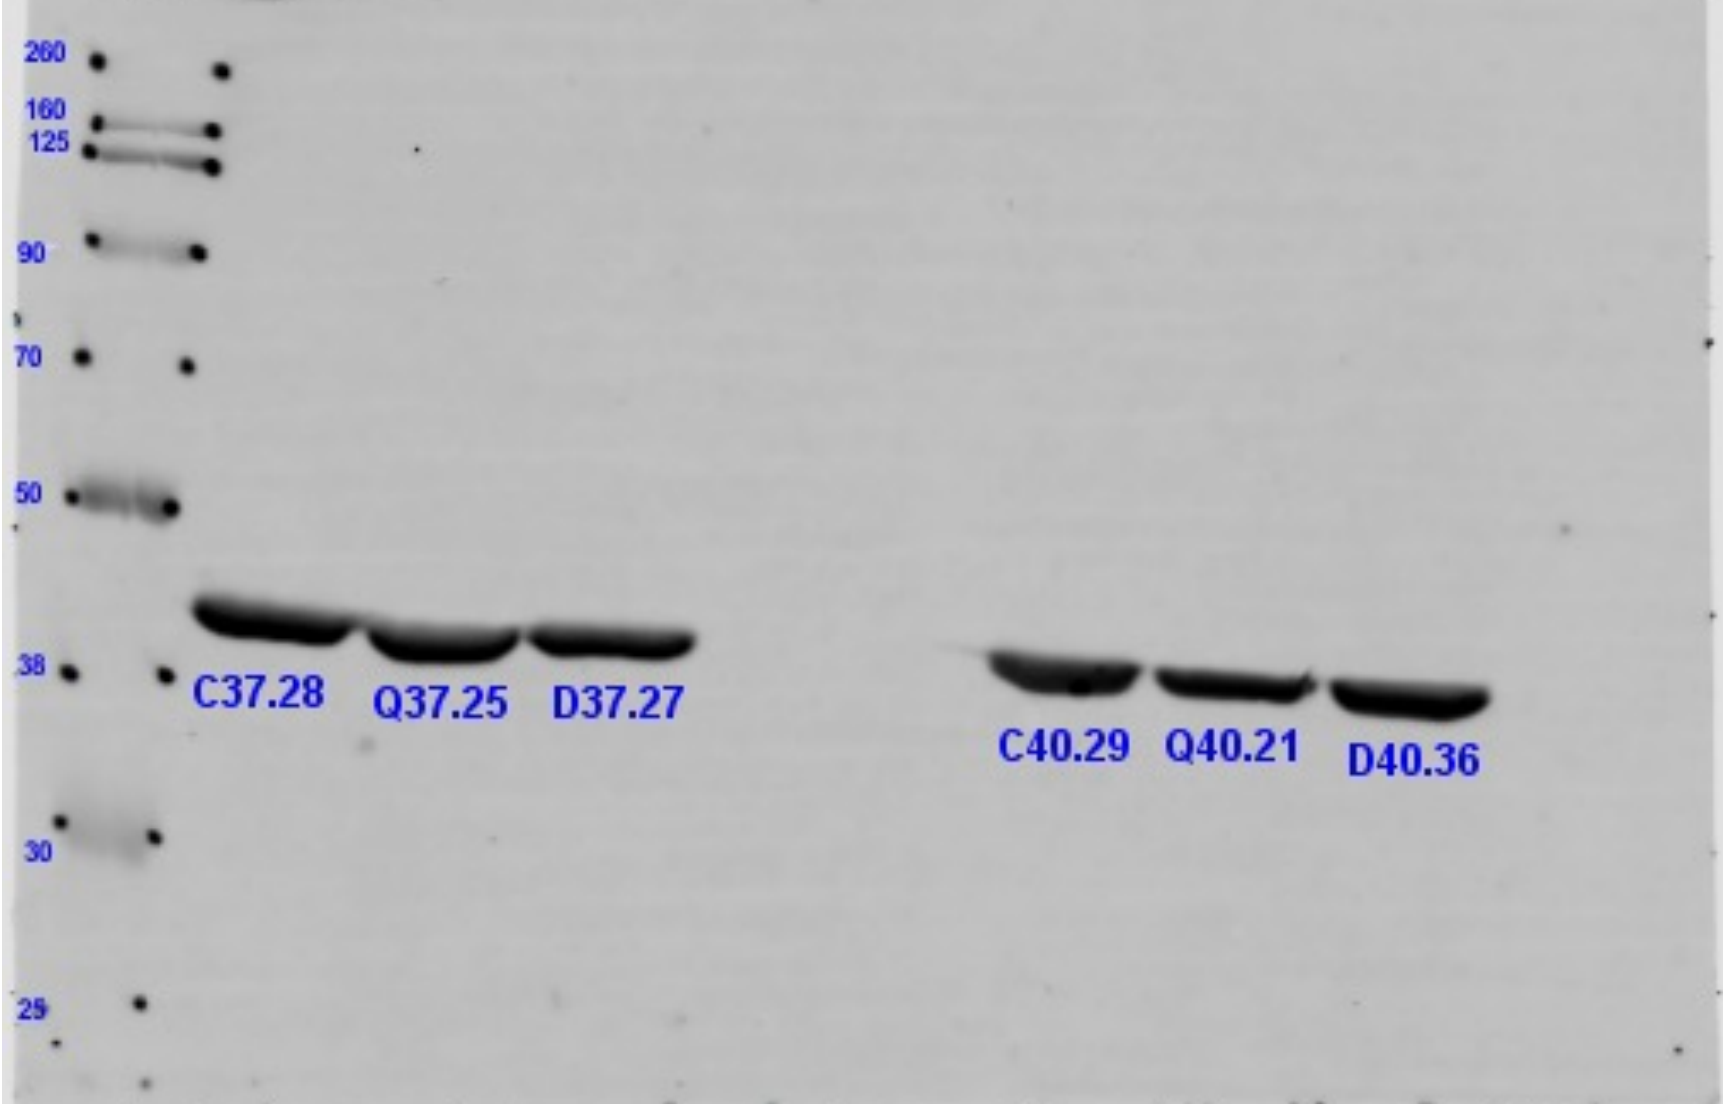

Supplement: elife-66005-fig2-figsupp2-data1.pdf [file elife-66005-fig2-figsupp2-data1.pdf]
