# Supplementary material for: Species-specific sensitivity to TGFβ signaling and changes to the Mmp13 promoter underlie avian jaw development and evolution
Source: PubMed Central journal article supplement (PMC9246370; doi:10.7554/elife.66005), 2022-06-06

Chameleon Duo Ladder C31 Q31 D31 C34 Q34 D34 DF-1 CCL-141  
Cells Cells

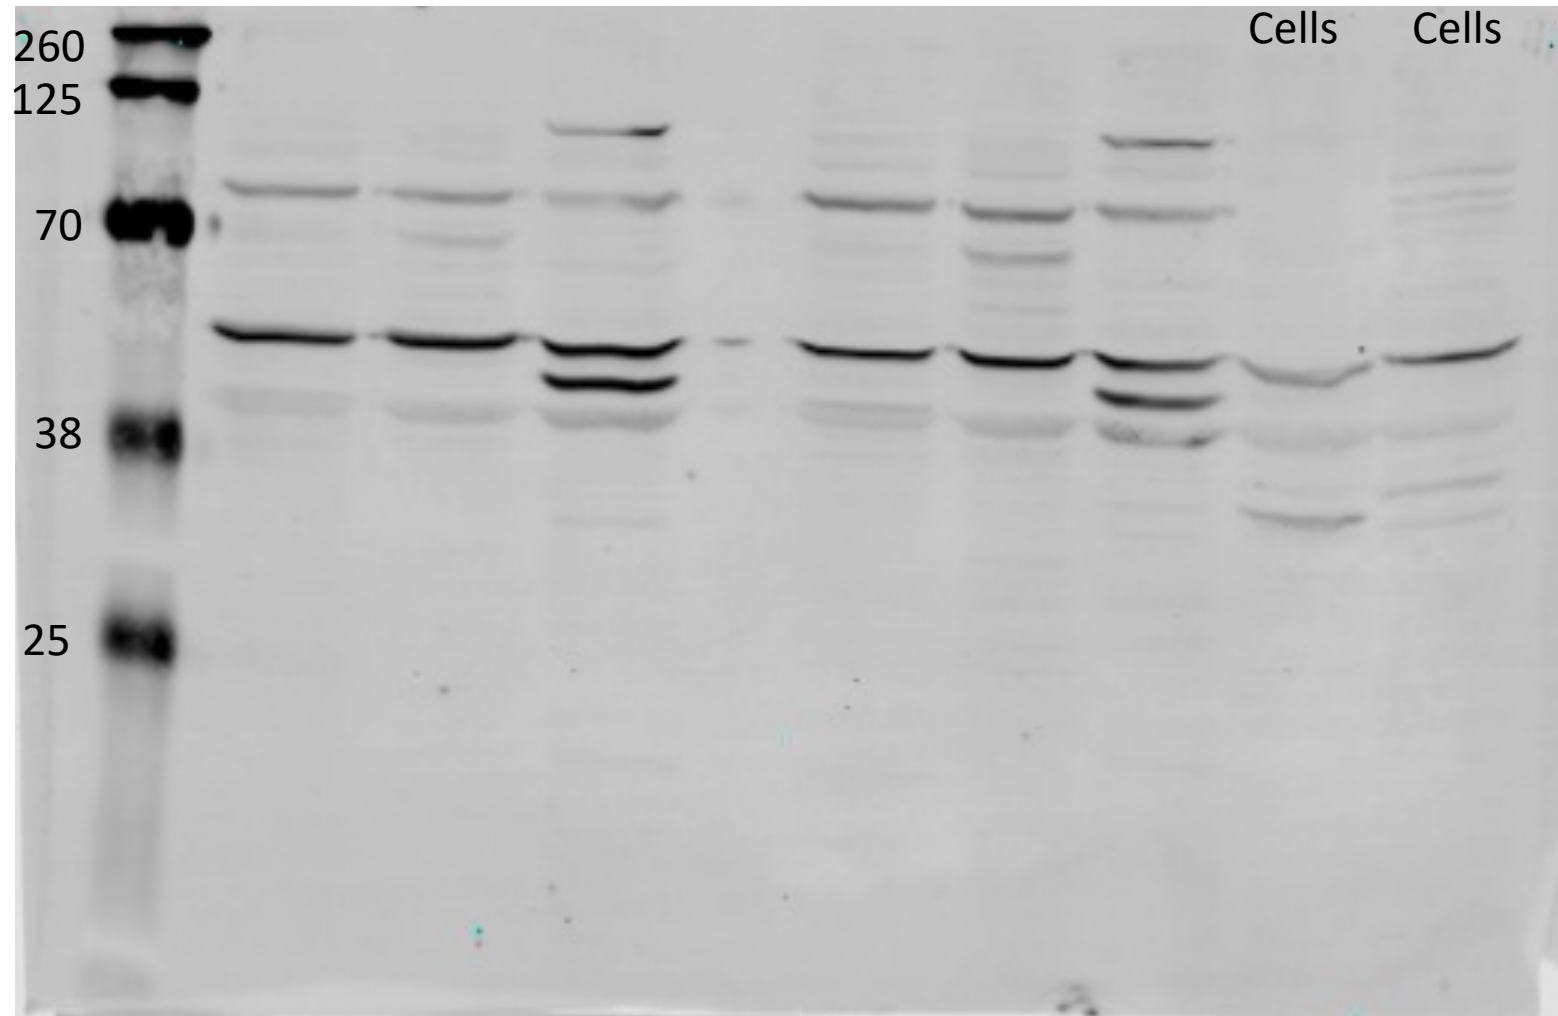

# Figure 2-figure supplement 2B-source data 1 ( $\beta$ -Actin)

Chameleon Duo Ladder C31 Q31 D31 C34 Q34 D34 DF-1 Cells CCL-141 Cells

160  
125  
90  
50  
30  
15

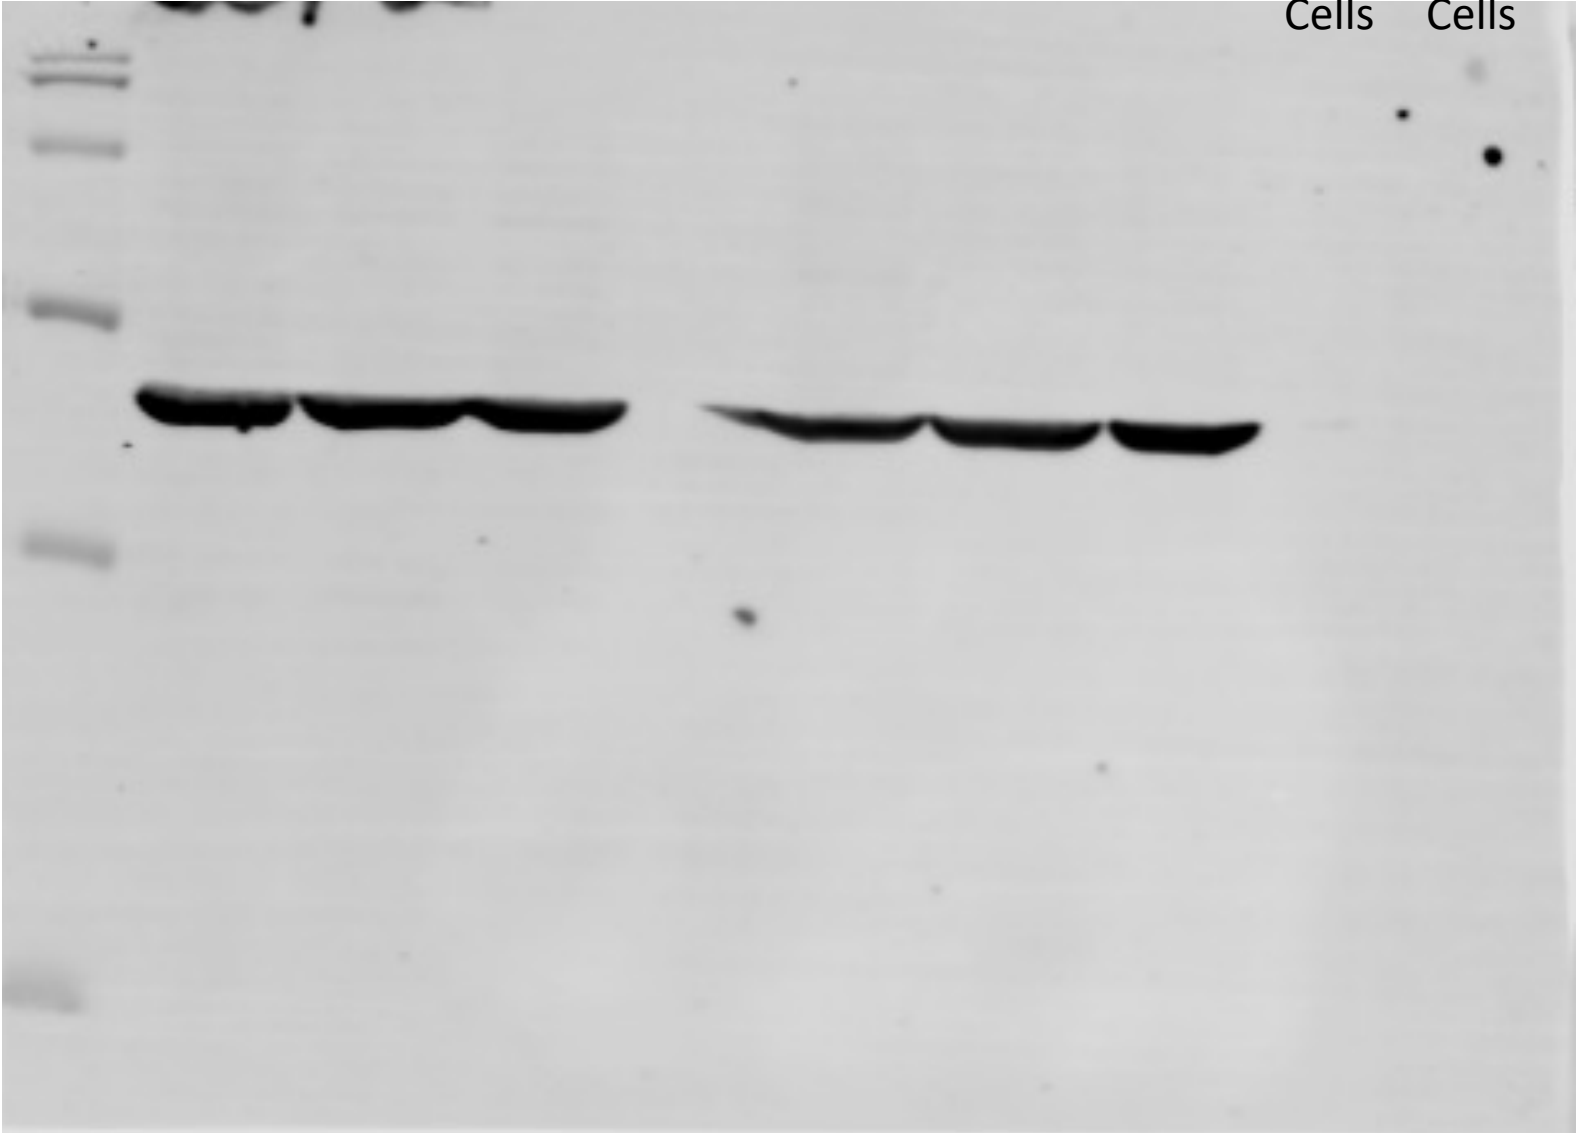

# Figure 2-figure supplement 2B-source data 1 (MMP13)

Chameleon Duo Ladder

C37

Q37

D37

C40

Q40

D40

260

125

70

38

25

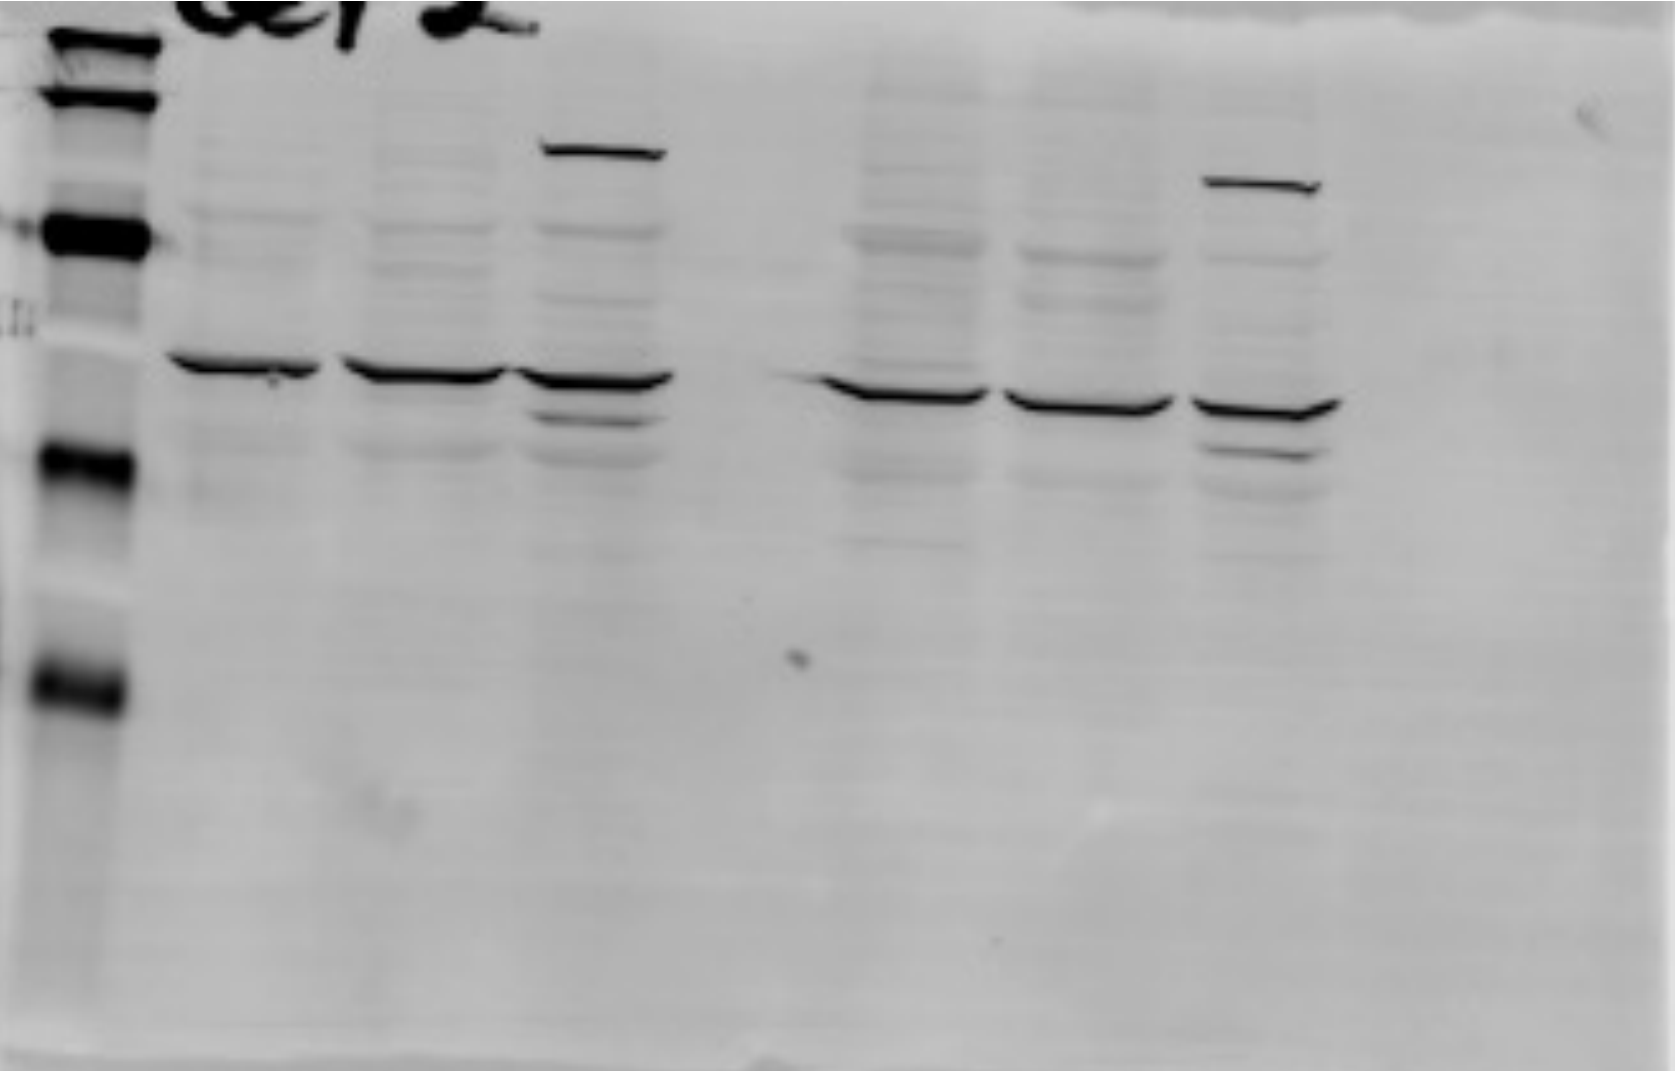

# Figure 2-figure supplement 2B-source data 1 ( $\beta$ -Actin)

Chameleon Duo Ladder

C37

Q37

D37

C40

Q40

D40

160  
125

90

50

30

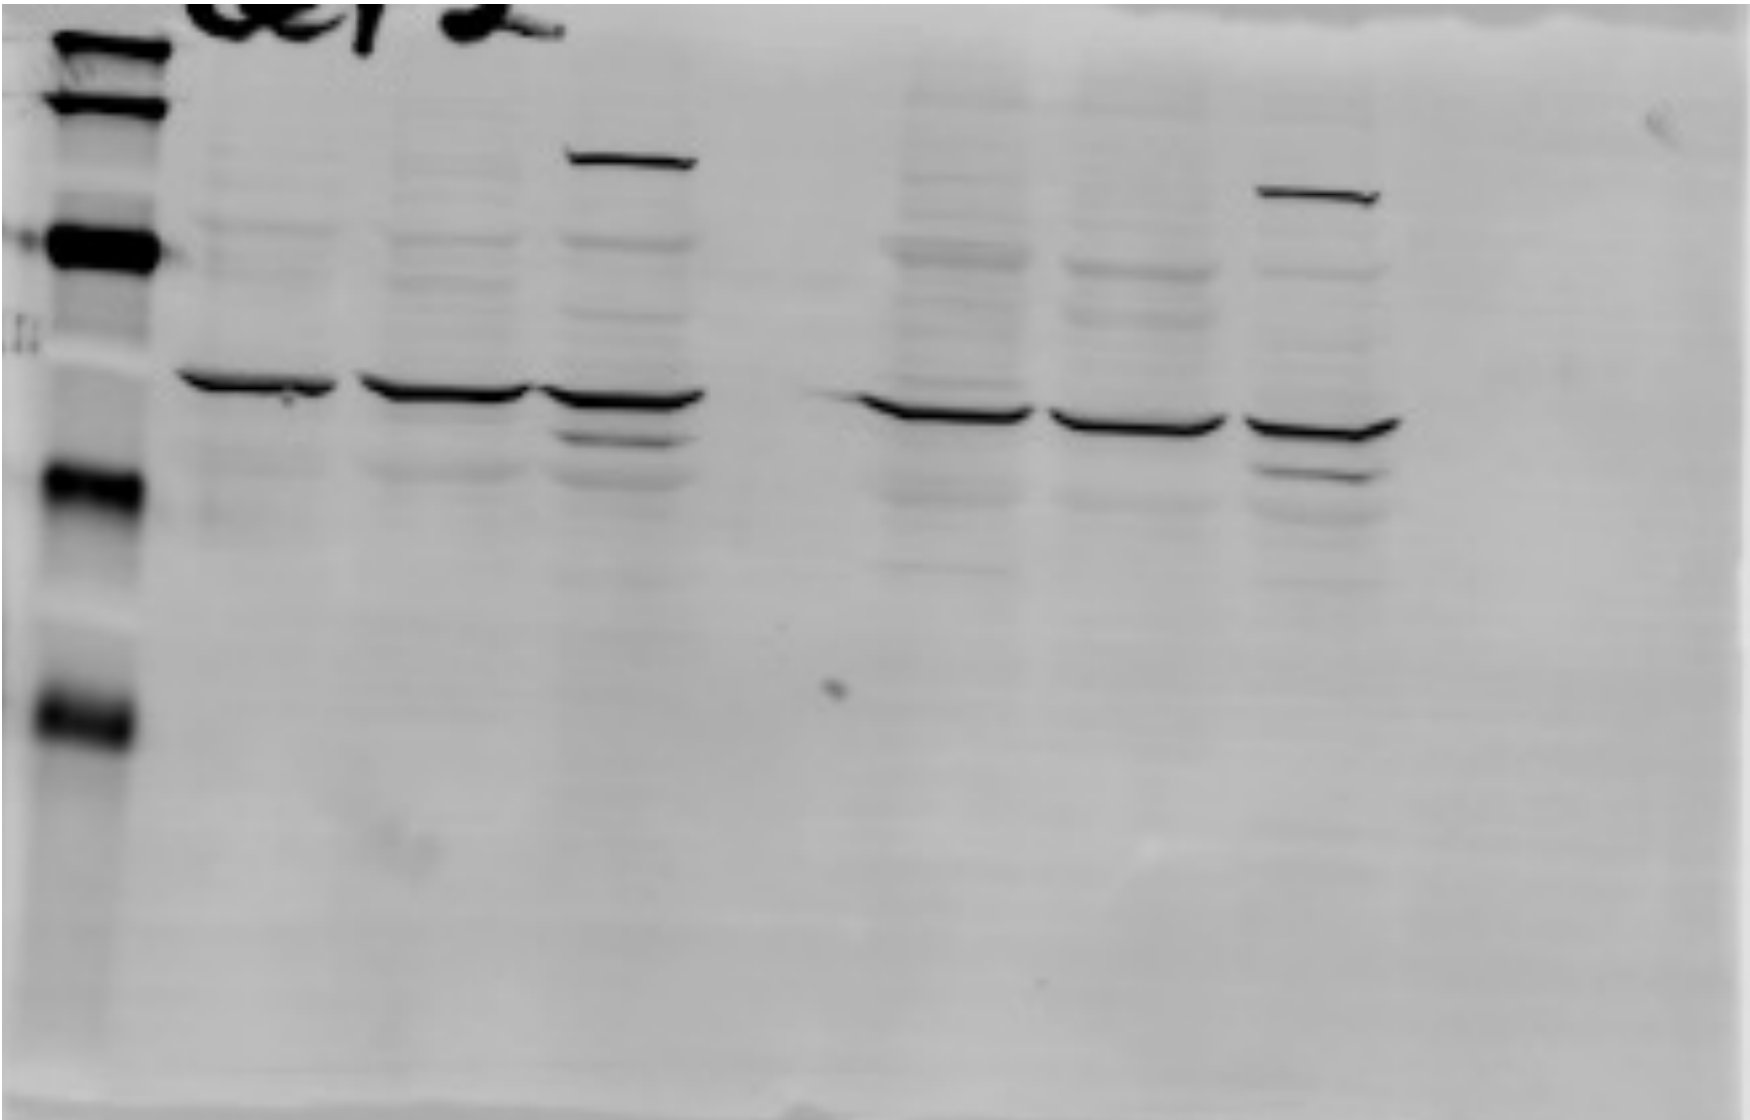

Supplement: elife-66005-fig2-figsupp2-data2.pdf [file elife-66005-fig2-figsupp2-data2.pdf]
