# Supplementary material for: Species-specific sensitivity to TGFβ signaling and changes to the Mmp13 promoter underlie avian jaw development and evolution
Source: PubMed Central journal article supplement (PMC9246370; doi:10.7554/elife.66005), 2022-06-06

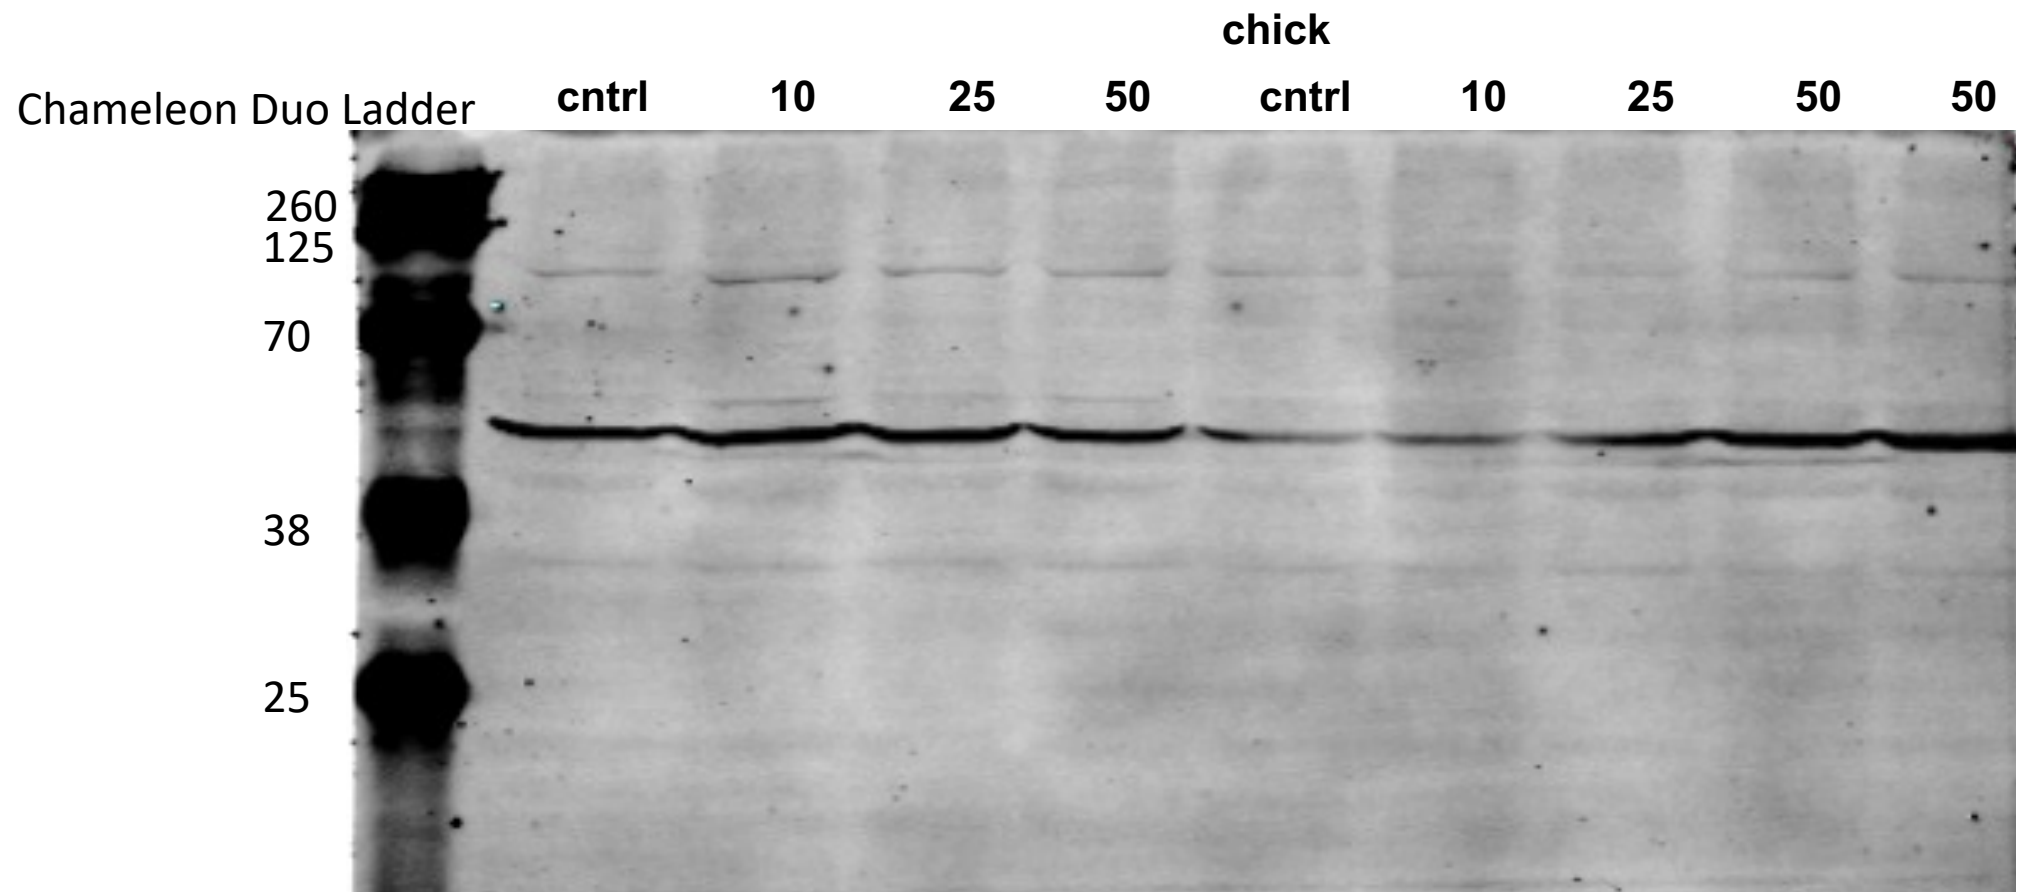

Figure 4-figure supplement 1B-source data 1 ( $\beta$ -Actin)

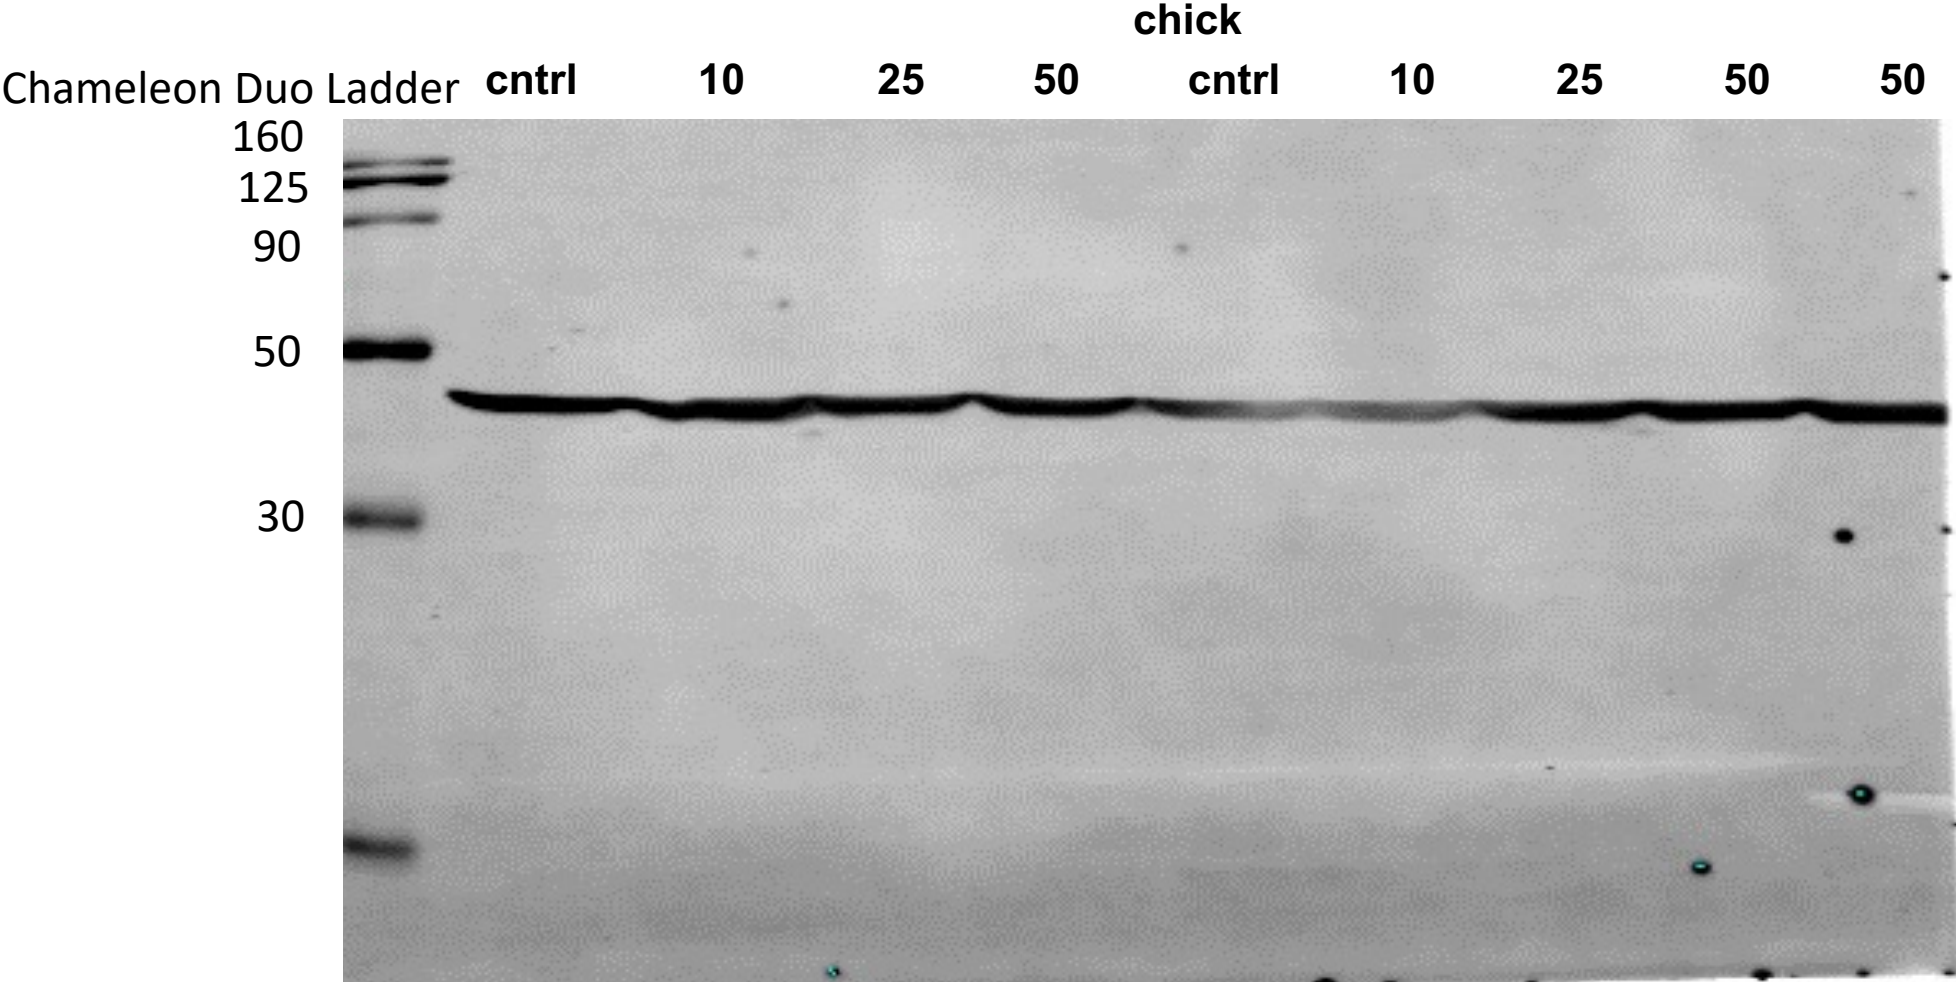

# Figure 4-figure supplement 1B-source data 1 (MMP13)

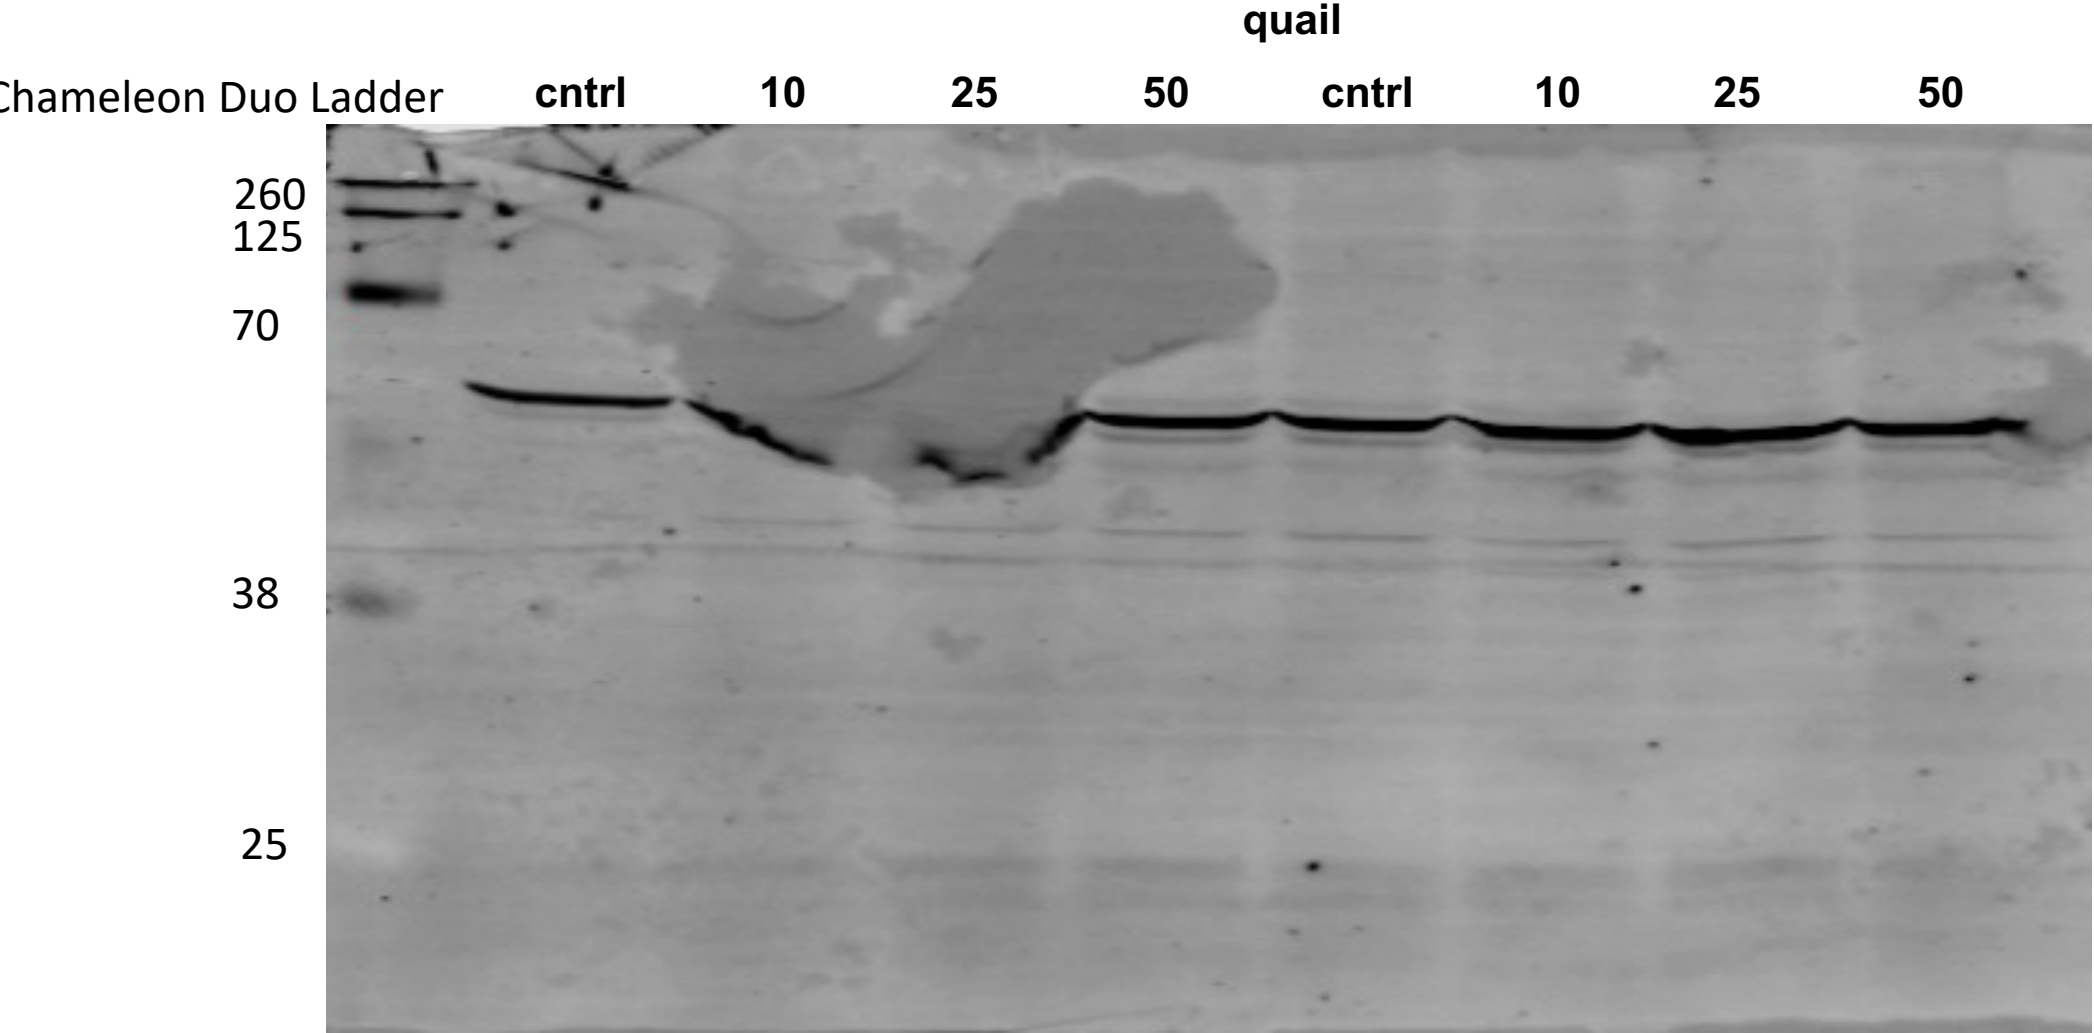

# Figure 4-figure supplement 1B-source data 1 ( $\beta$ -Actin)

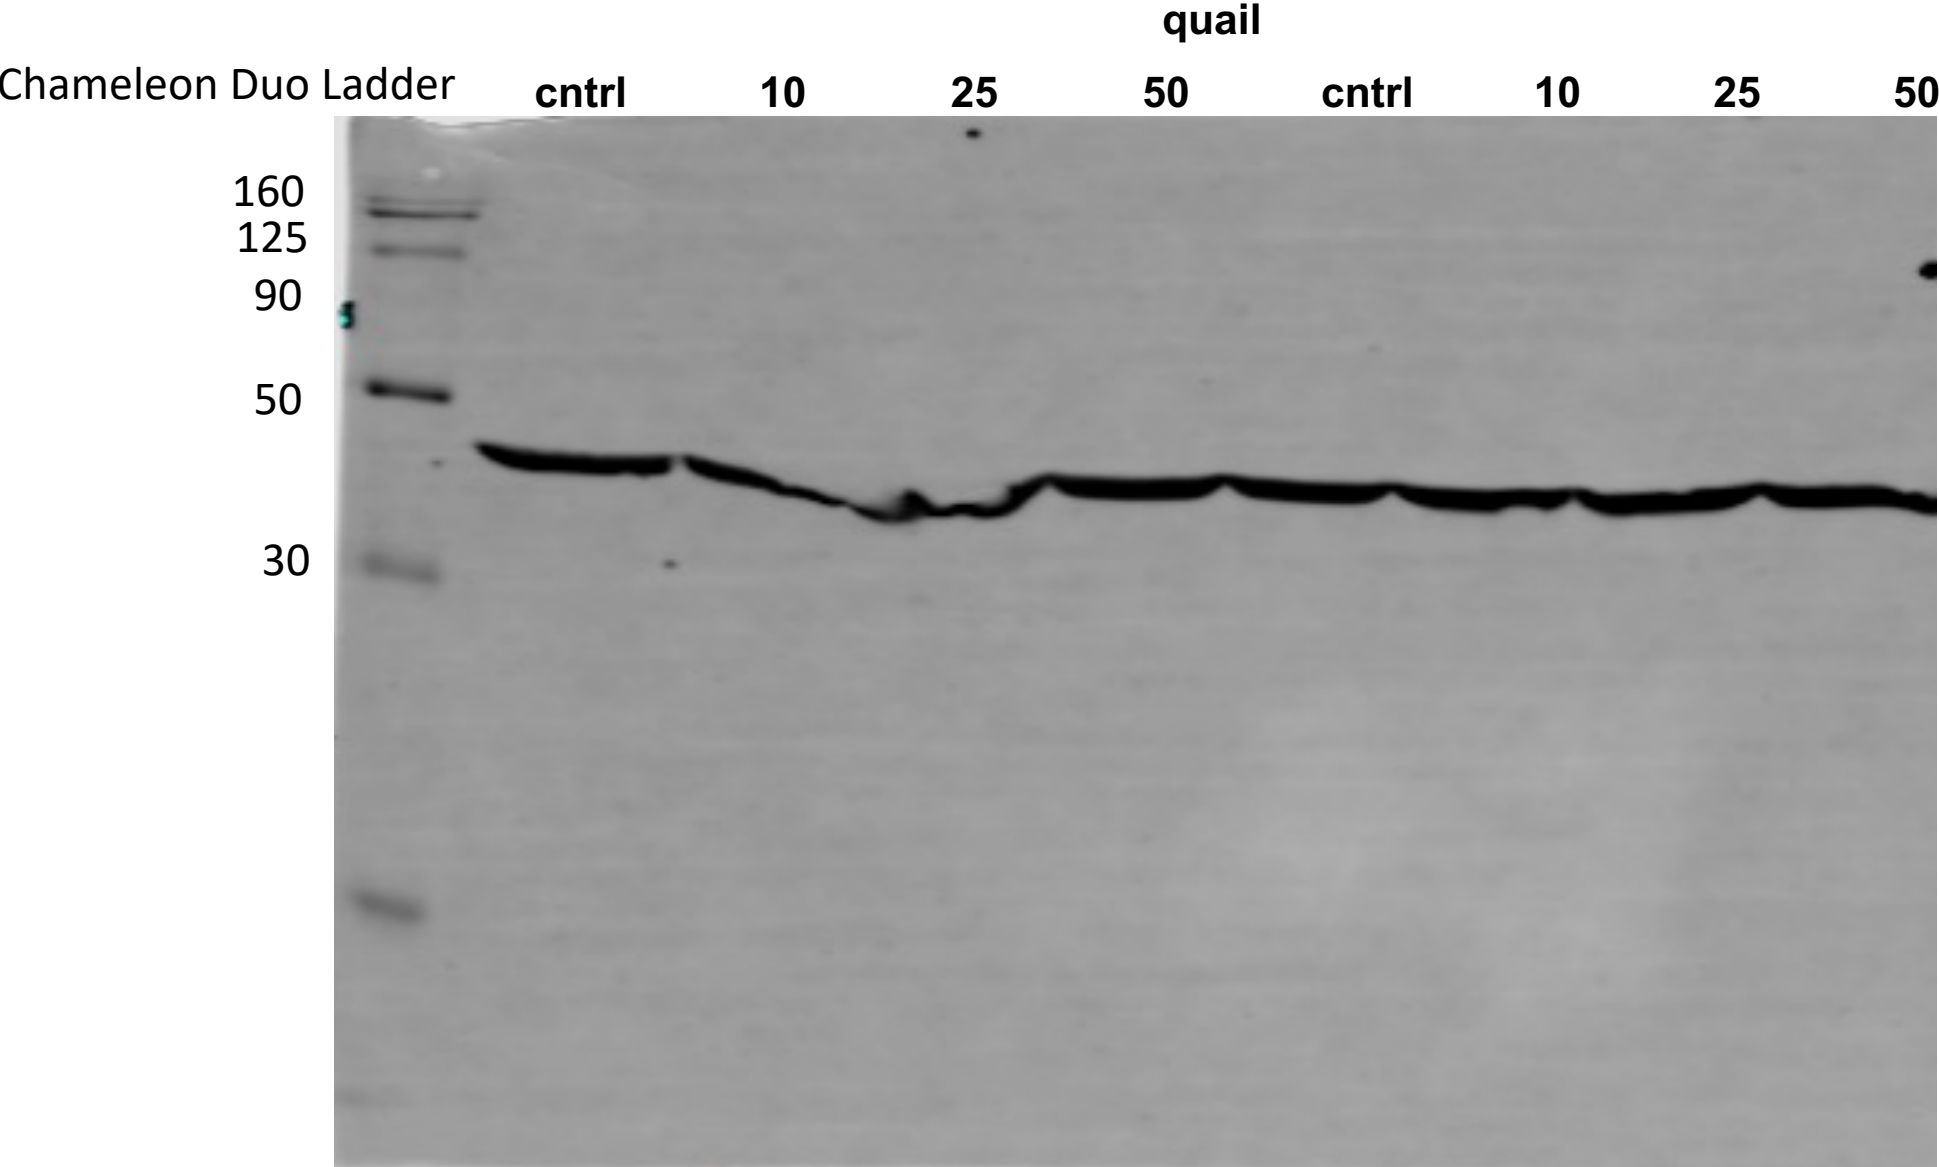



# Figure 4-figure supplement 1B-source data 1 ( $\beta$ -Actin)

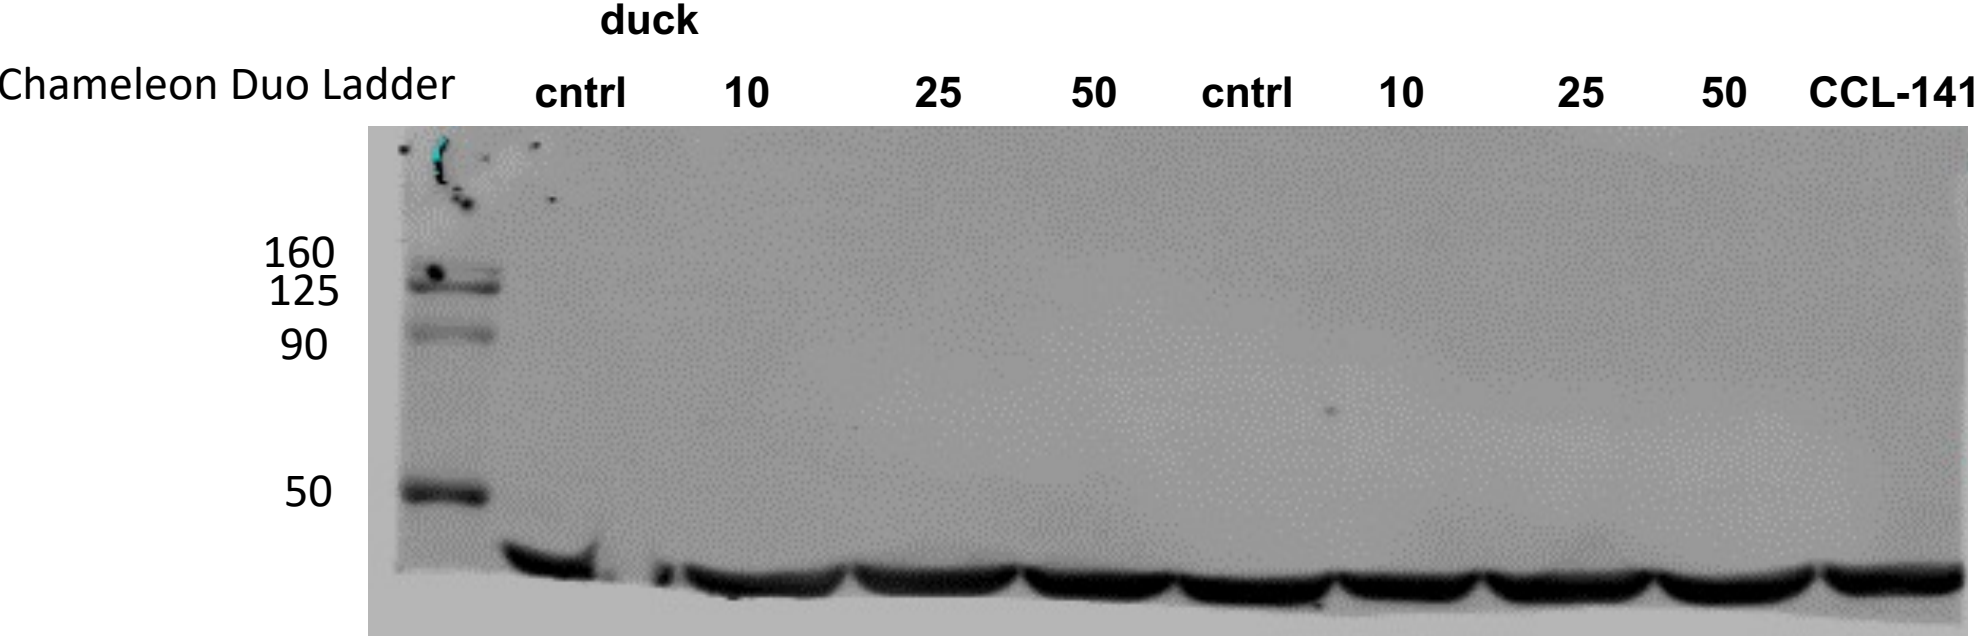

Supplement: elife-66005-fig4-figsupp1-data2.pdf [file elife-66005-fig4-figsupp1-data2.pdf]
