# Supplementary material for: Species-specific sensitivity to TGFβ signaling and changes to the Mmp13 promoter underlie avian jaw development and evolution
Source: eLife journal article supplement (doi:10.7554/elife.66005), 2022-06-06

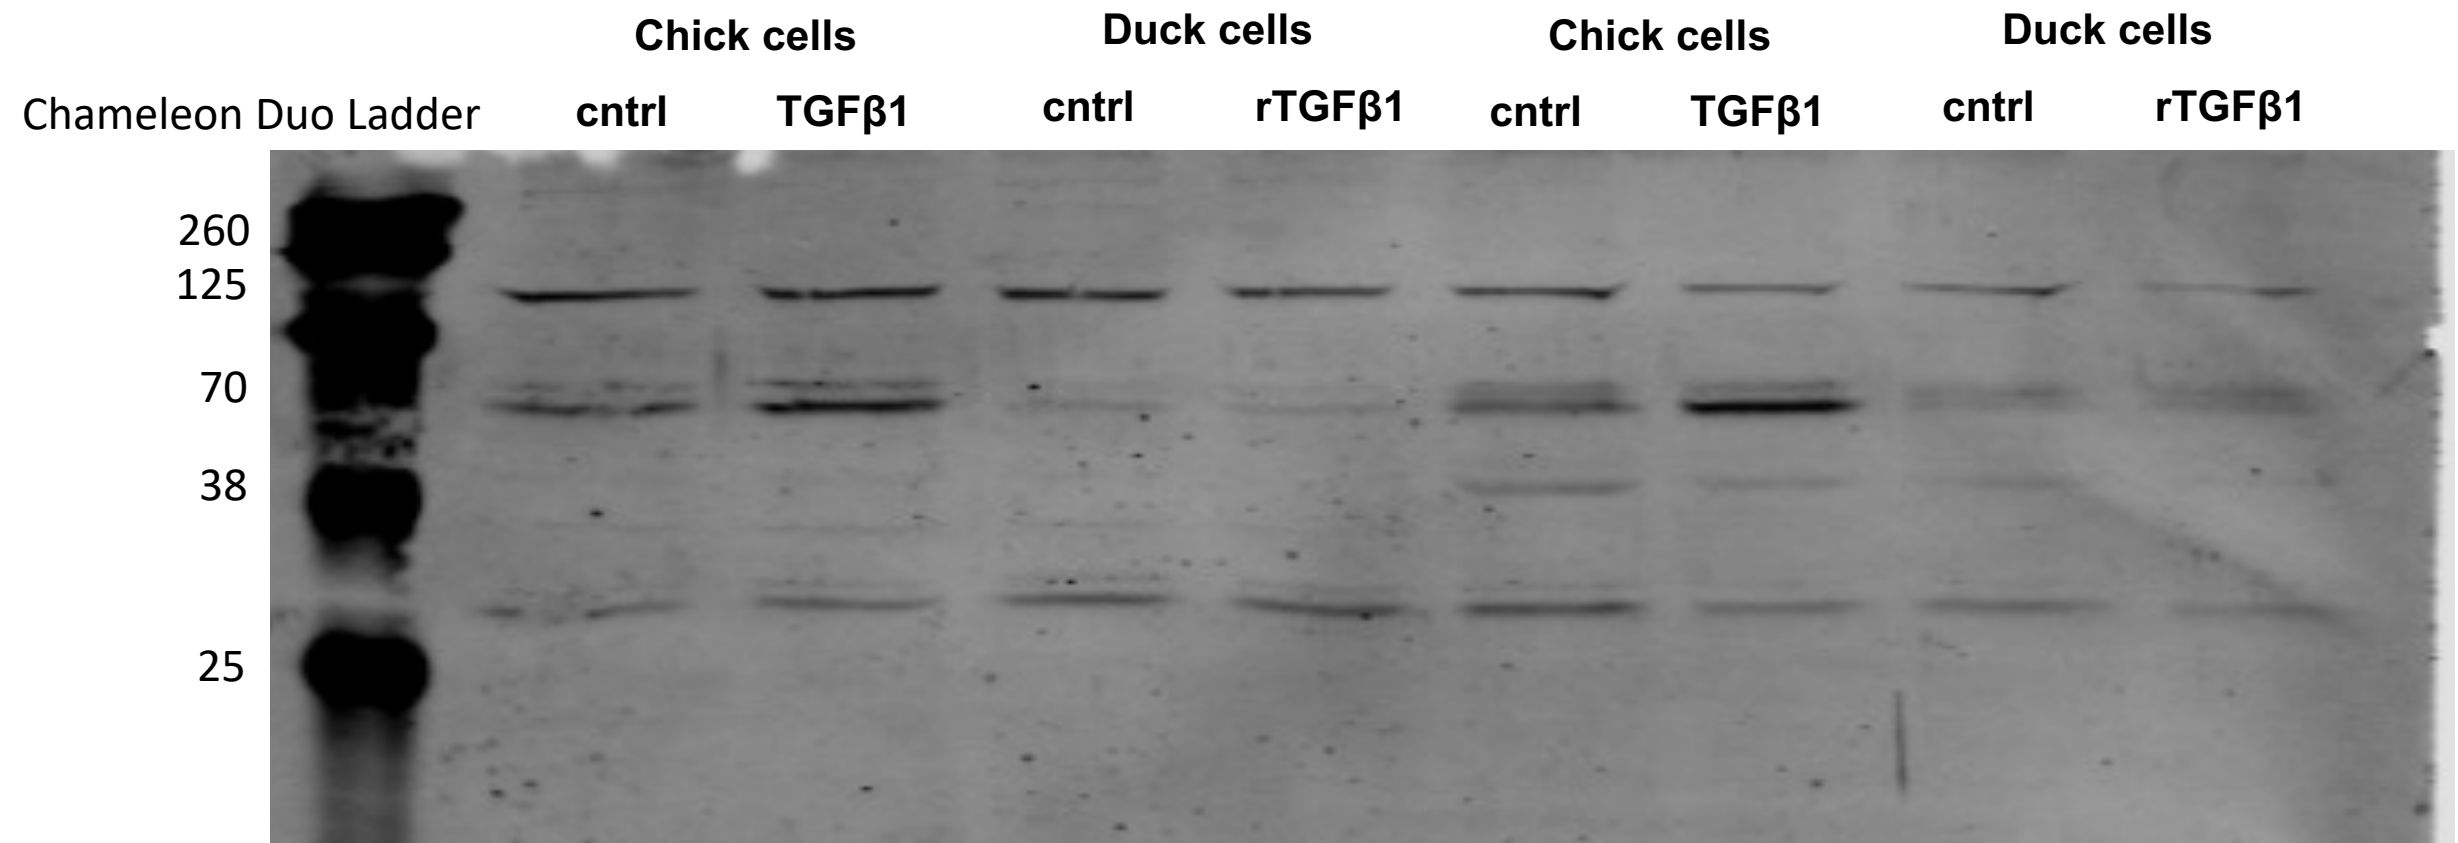

# Figure 3-figure supplement 1A-source data 1 ( $\beta$ -Actin)

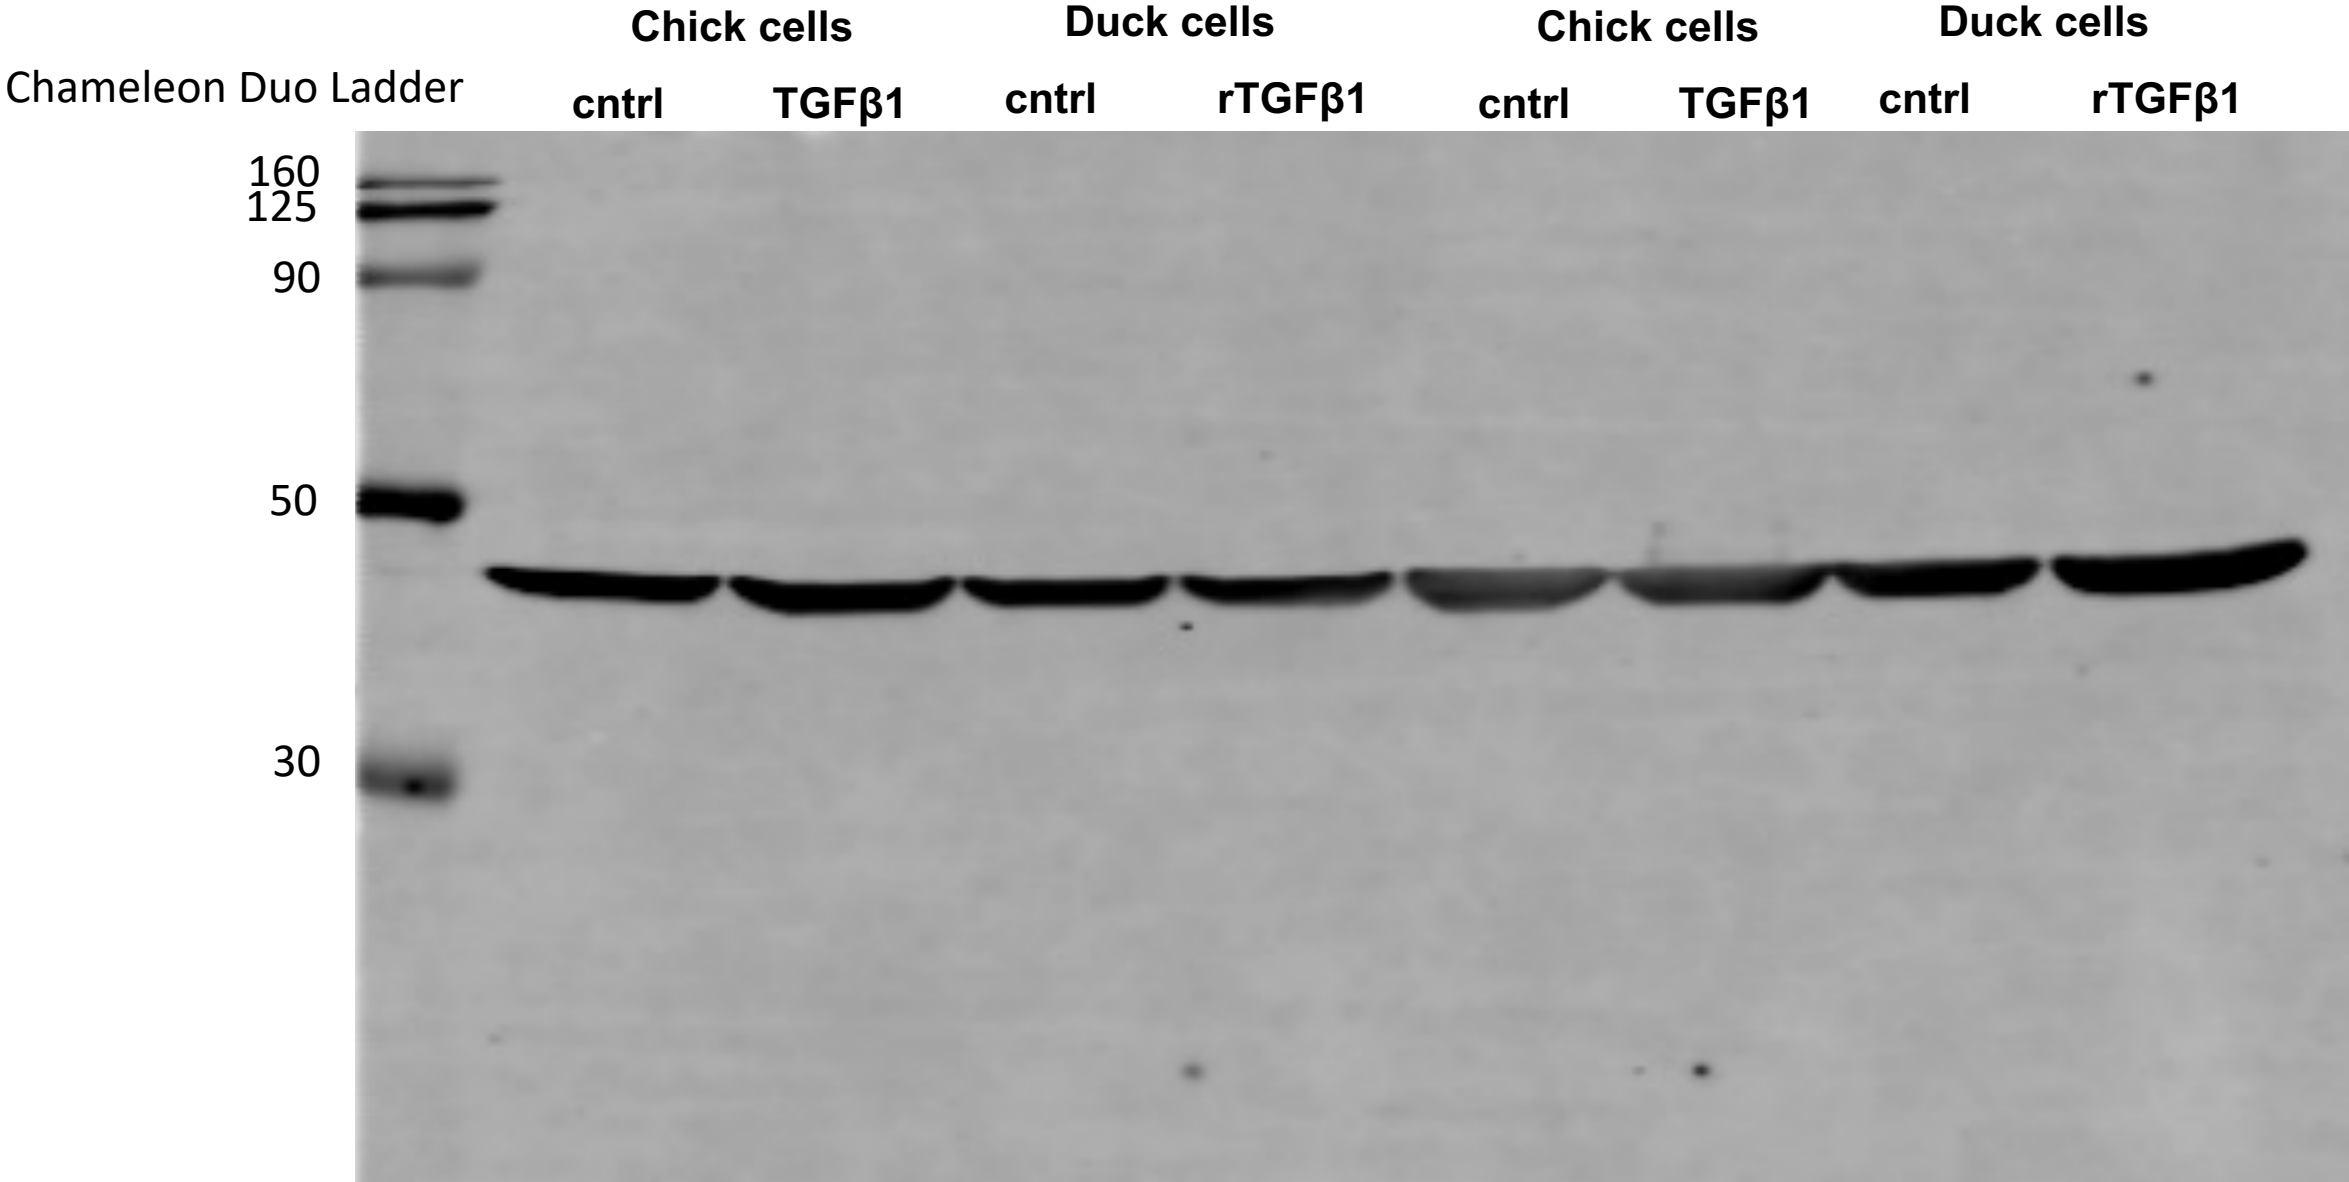

Supplement: fig3-figsupp1-data1 [file elife-66005-fig3-figsupp1-data1-v2.pdf]
