# Supplementary material for: Species-specific sensitivity to TGFβ signaling and changes to the Mmp13 promoter underlie avian jaw development and evolution
Source: eLife journal article supplement (doi:10.7554/elife.66005), 2022-06-06

|                      |         |        |        |       |         |        |       |
|----------------------|---------|--------|--------|-------|---------|--------|-------|
|                      |         |        | rTGFβ1 |       |         | rTGFβ1 |       |
|                      |         |        | +      |       |         | +      |       |
| Chameleon Duo Ladder | Control | rTGFβ1 | TGFβi  | TGFβi | Control | rTGFβ1 | TGFβi |

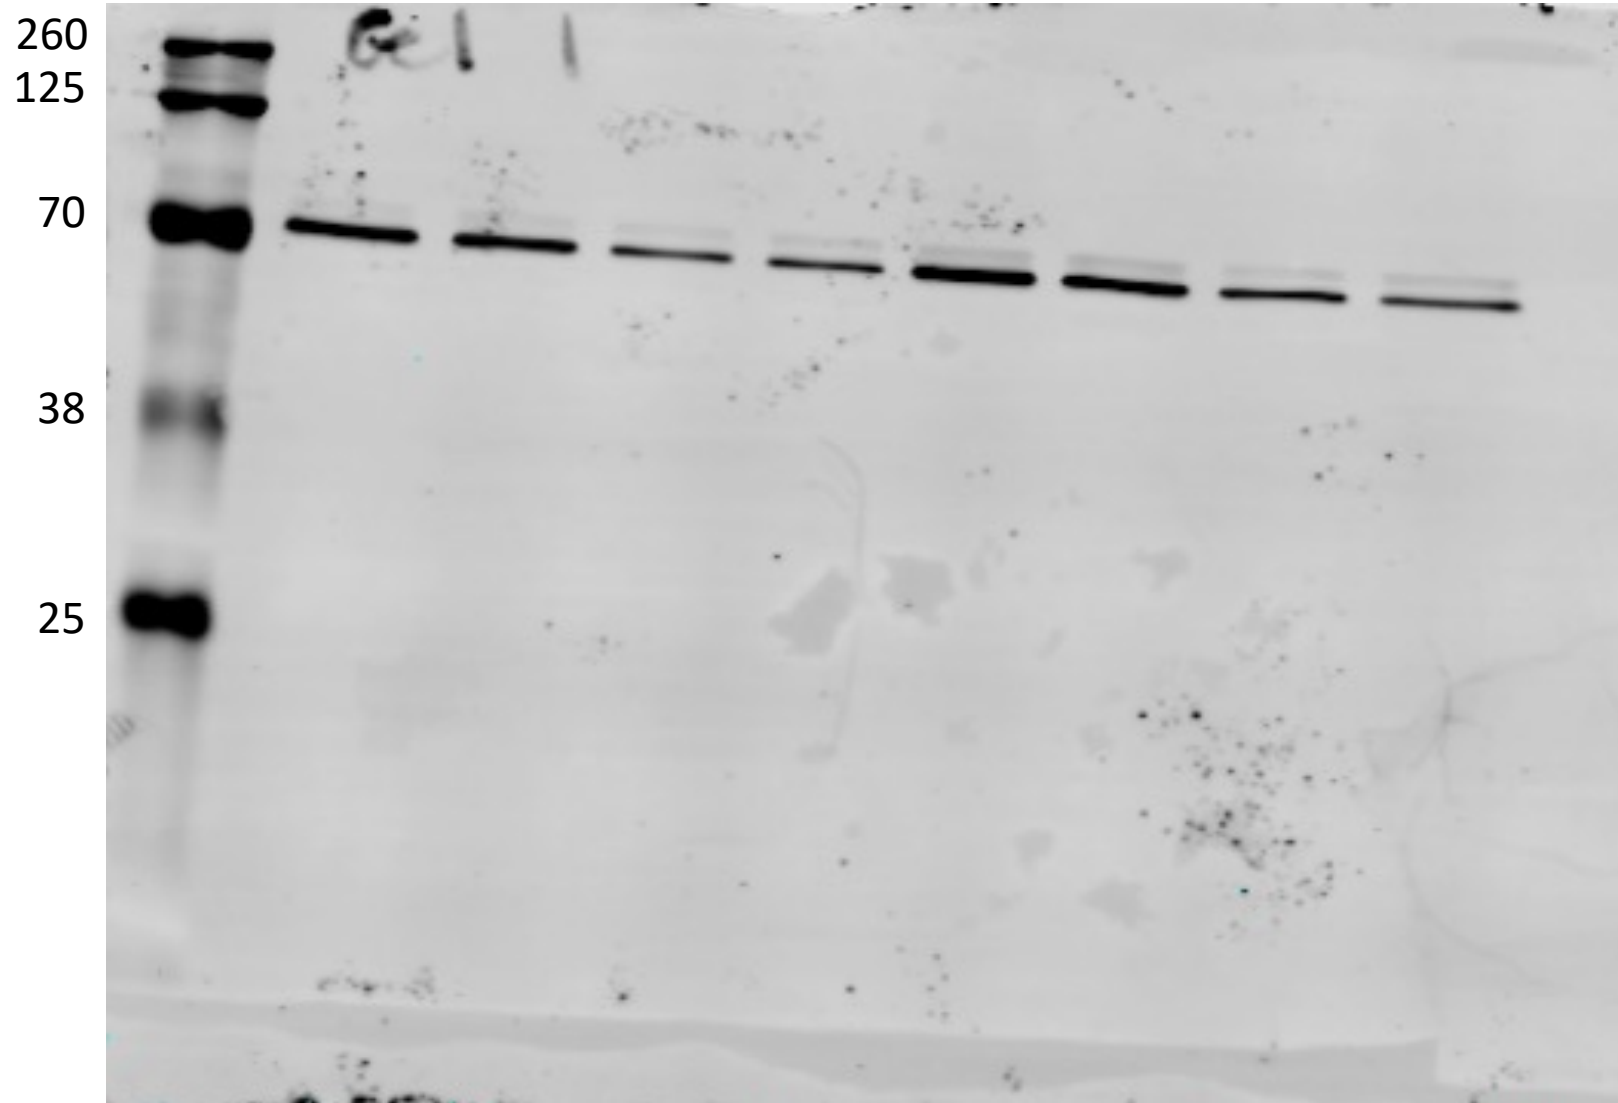

# Figure 3-figure supplement 3B-source data 1 ( $\beta$ -Actin)

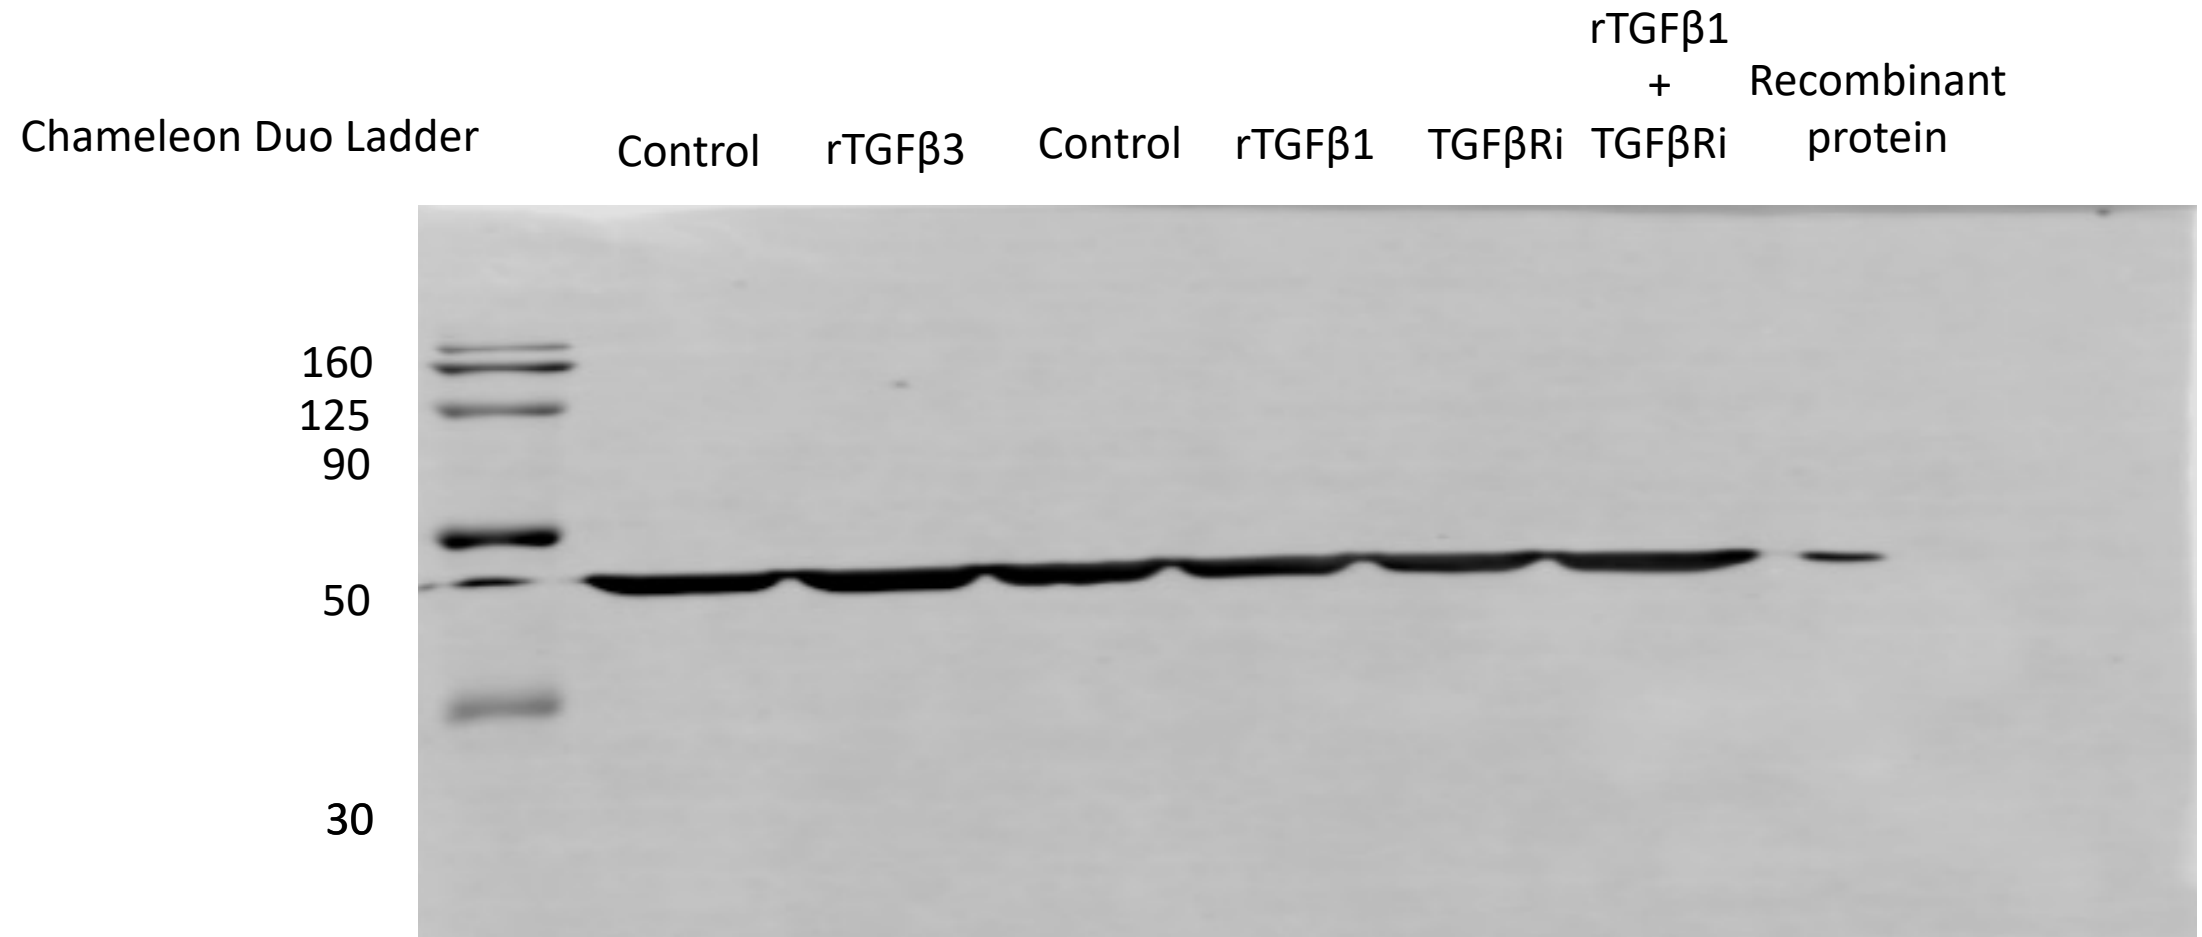

# Figure 3-figure supplement 3B-source data 1 (MMP13)

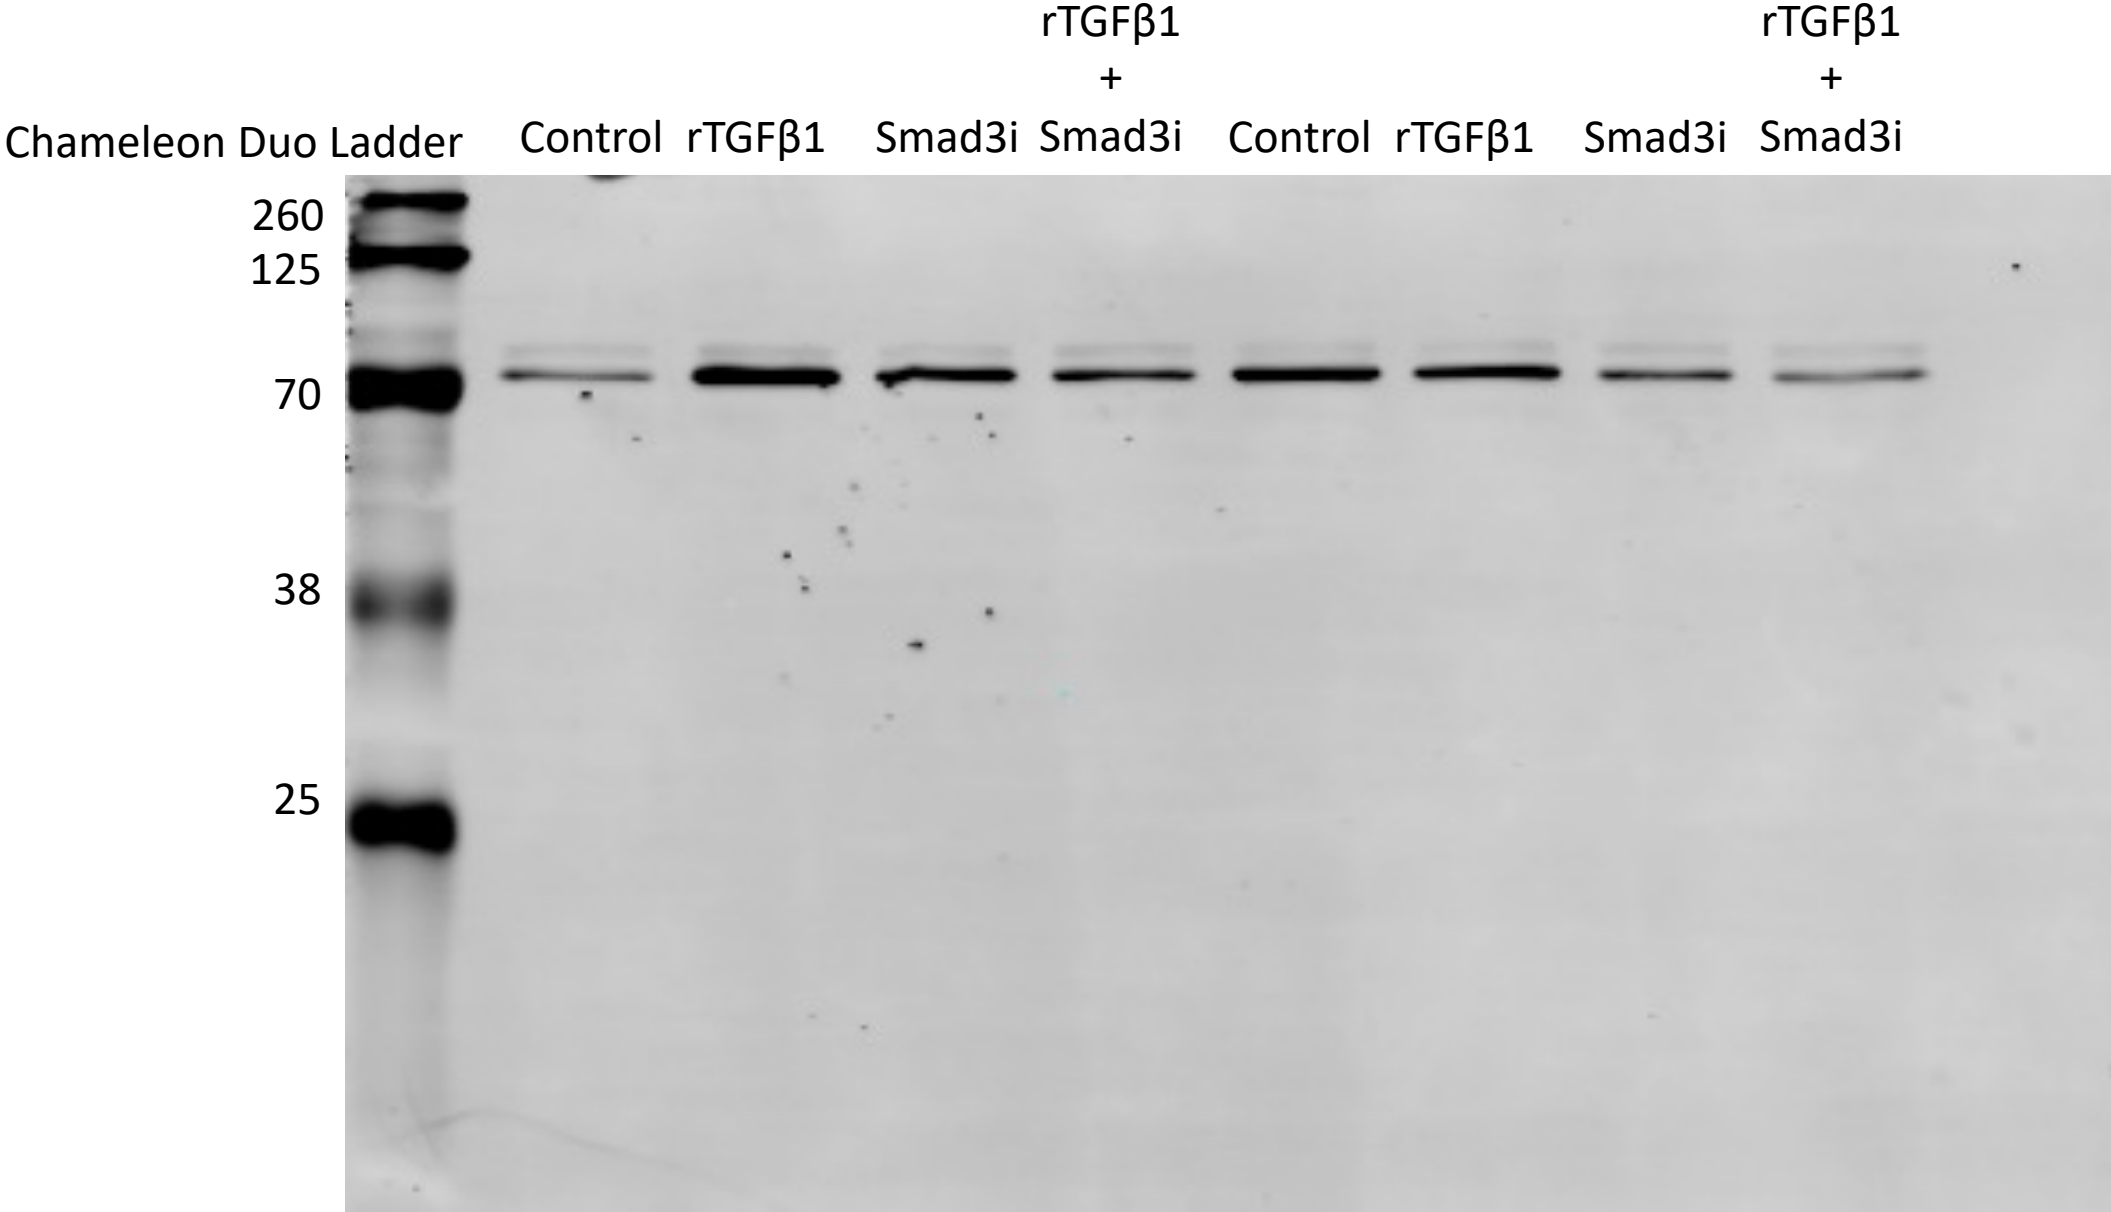

# Figure 3-figure supplement 3B-source data 1 ( $\beta$ -Actin)

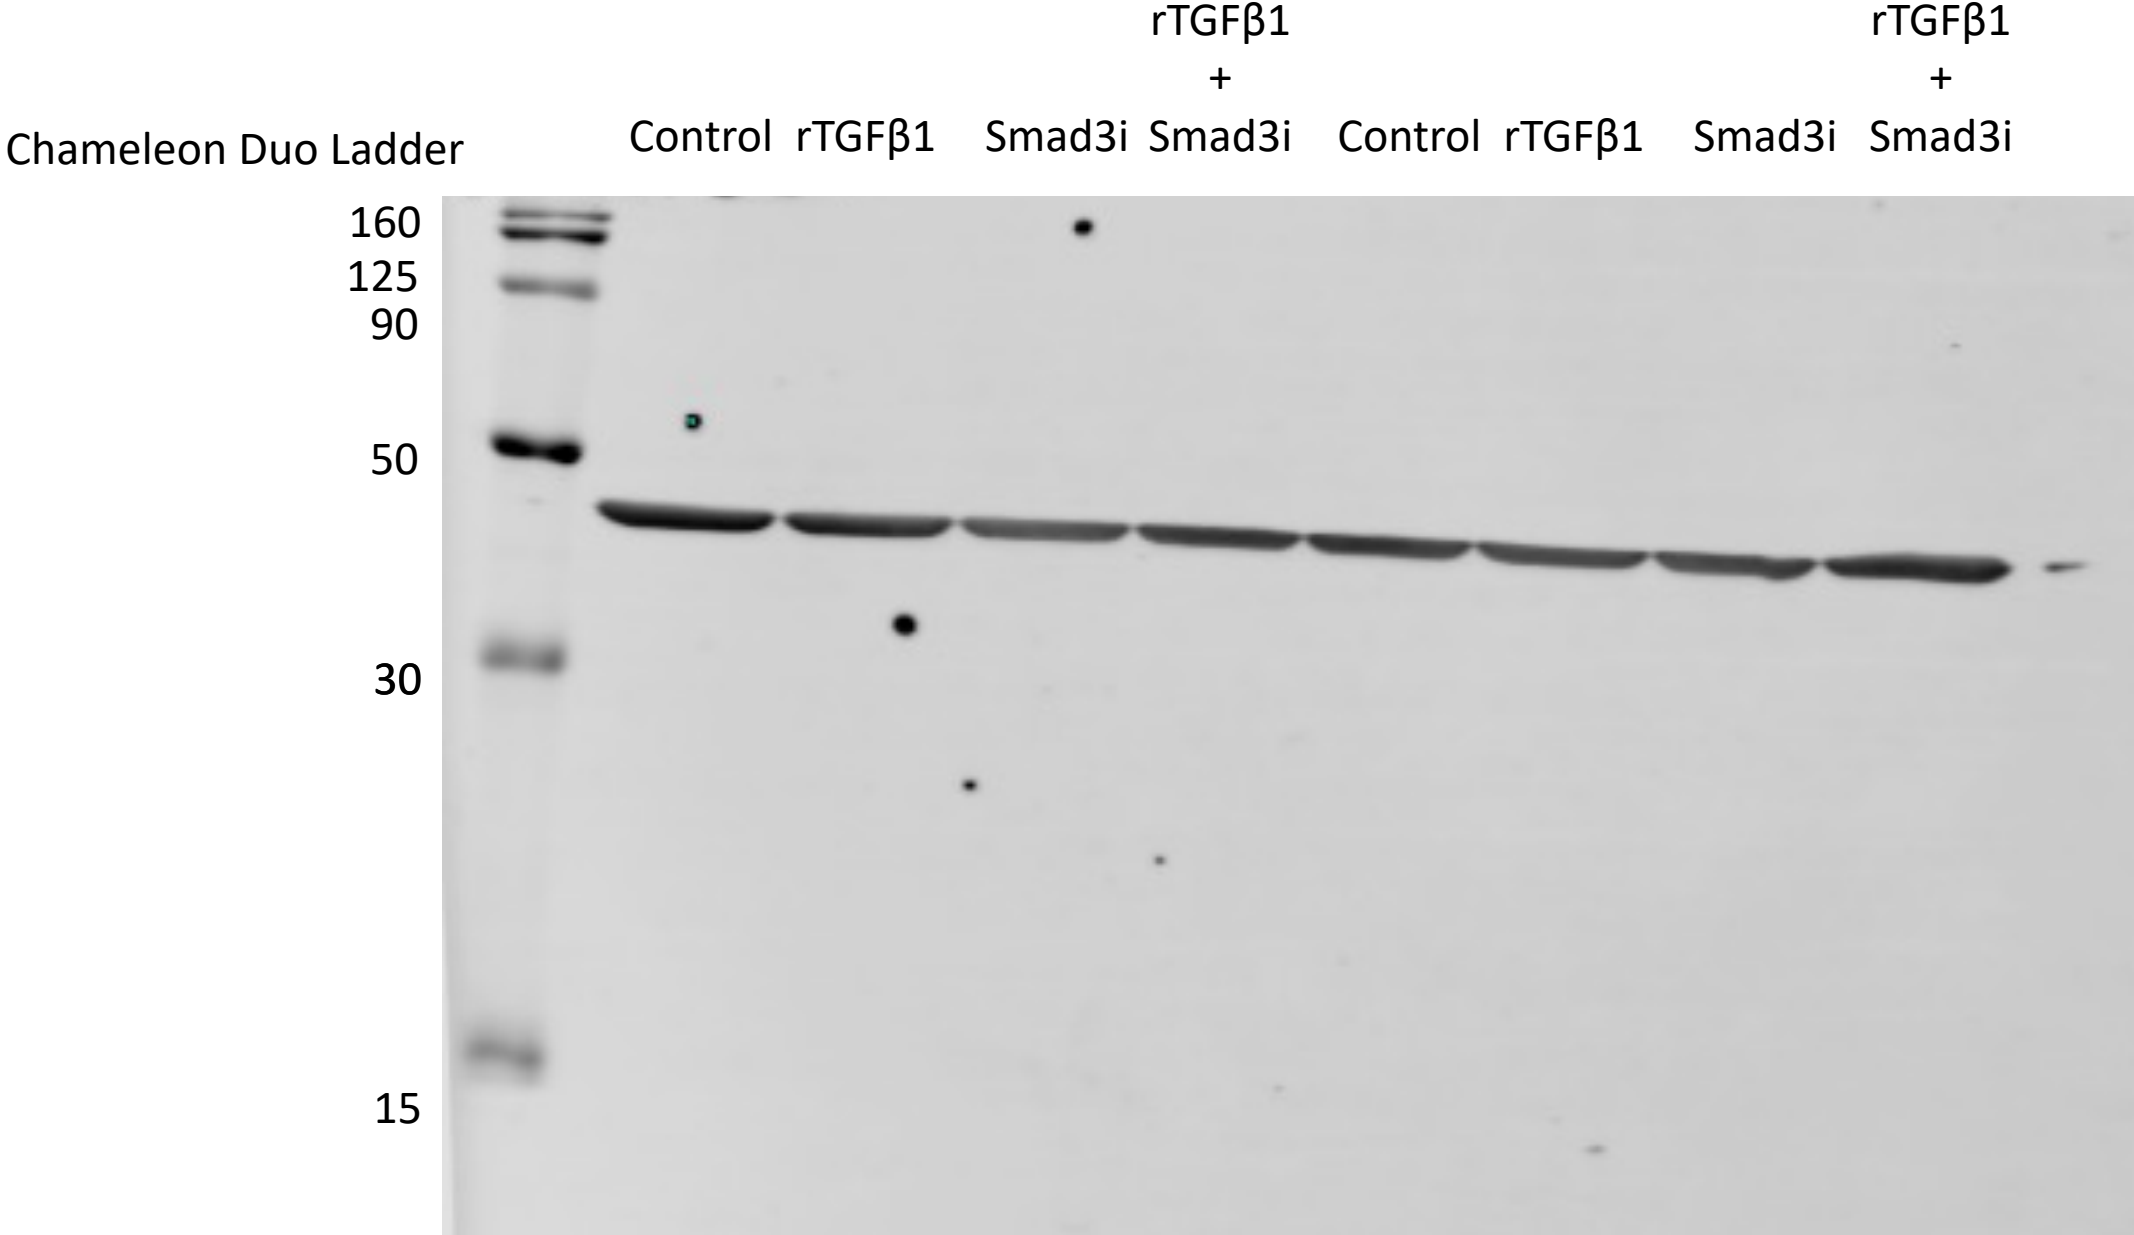

Supplement: fig3-figsupp3-data2 [file elife-66005-fig3-figsupp3-data2-v2.pdf]
