# Supplementary material for: Species-specific sensitivity to TGFβ signaling and changes to the Mmp13 promoter underlie avian jaw development and evolution
Source: eLife journal article supplement (doi:10.7554/elife.66005), 2022-06-06

**chick**

Chameleon Duo Ladder

**cntrl**

**10**

**25**

**cntrl**

**25**

**50**

260

125

70

38

25

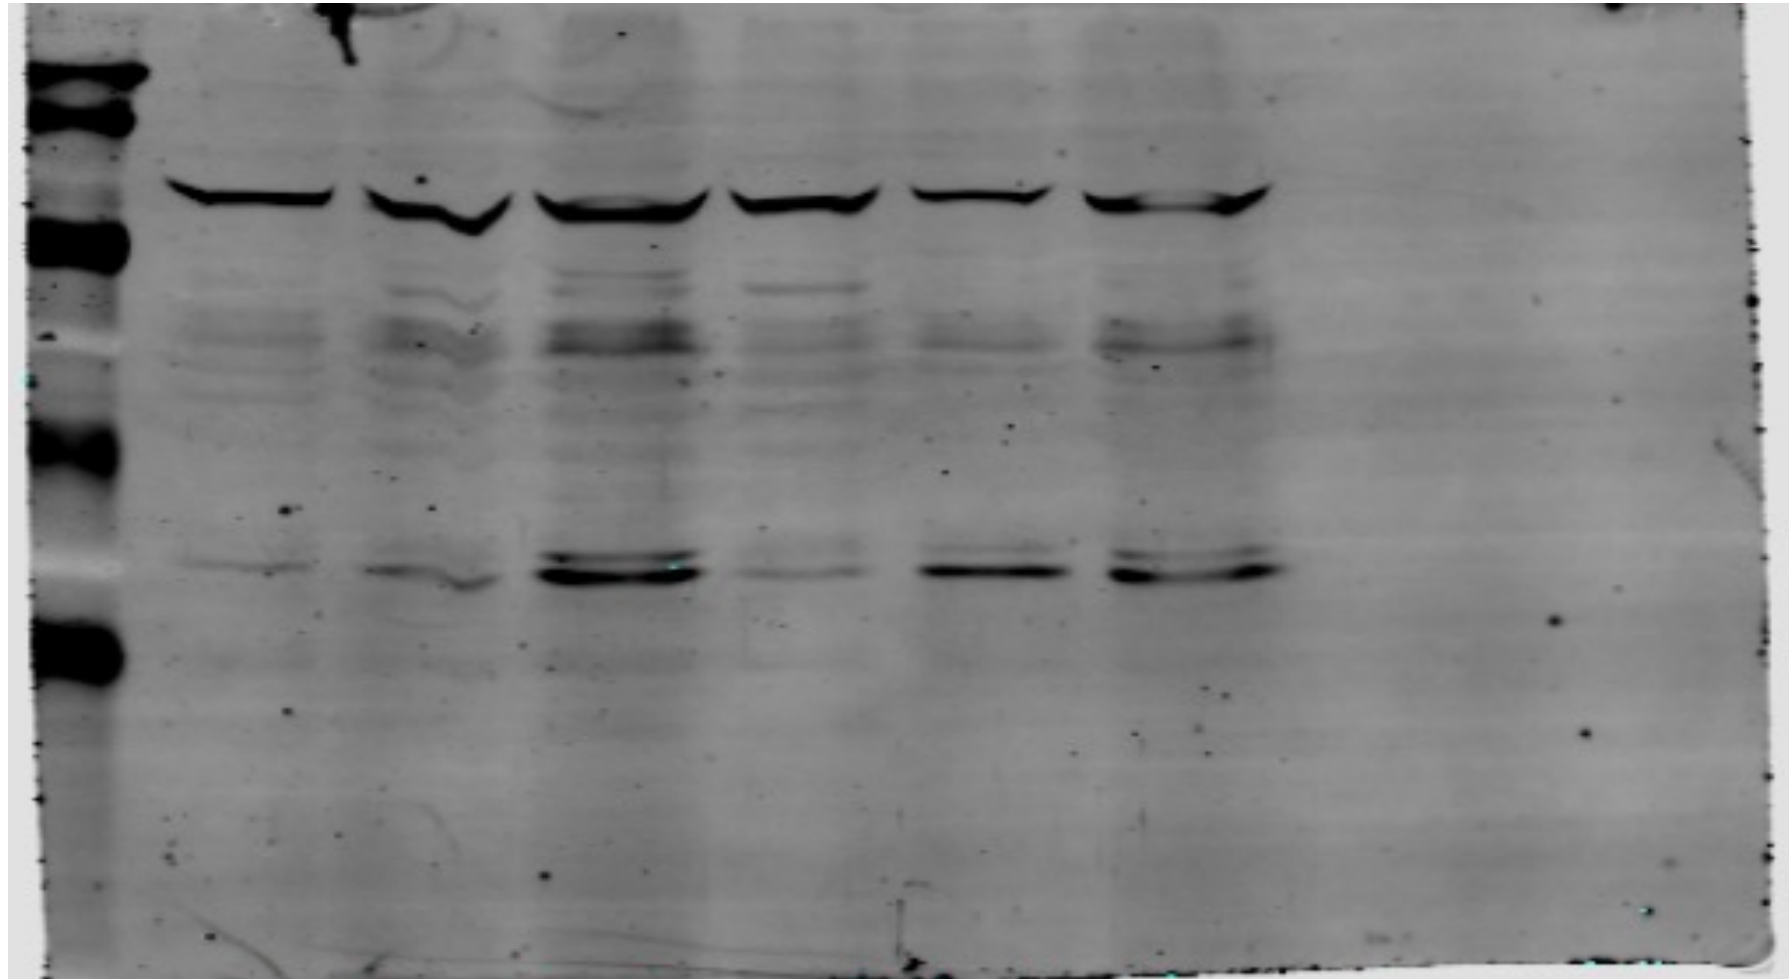

# Figure 4-figure supplement 1A-source data 1 ( $\beta$ -Actin)

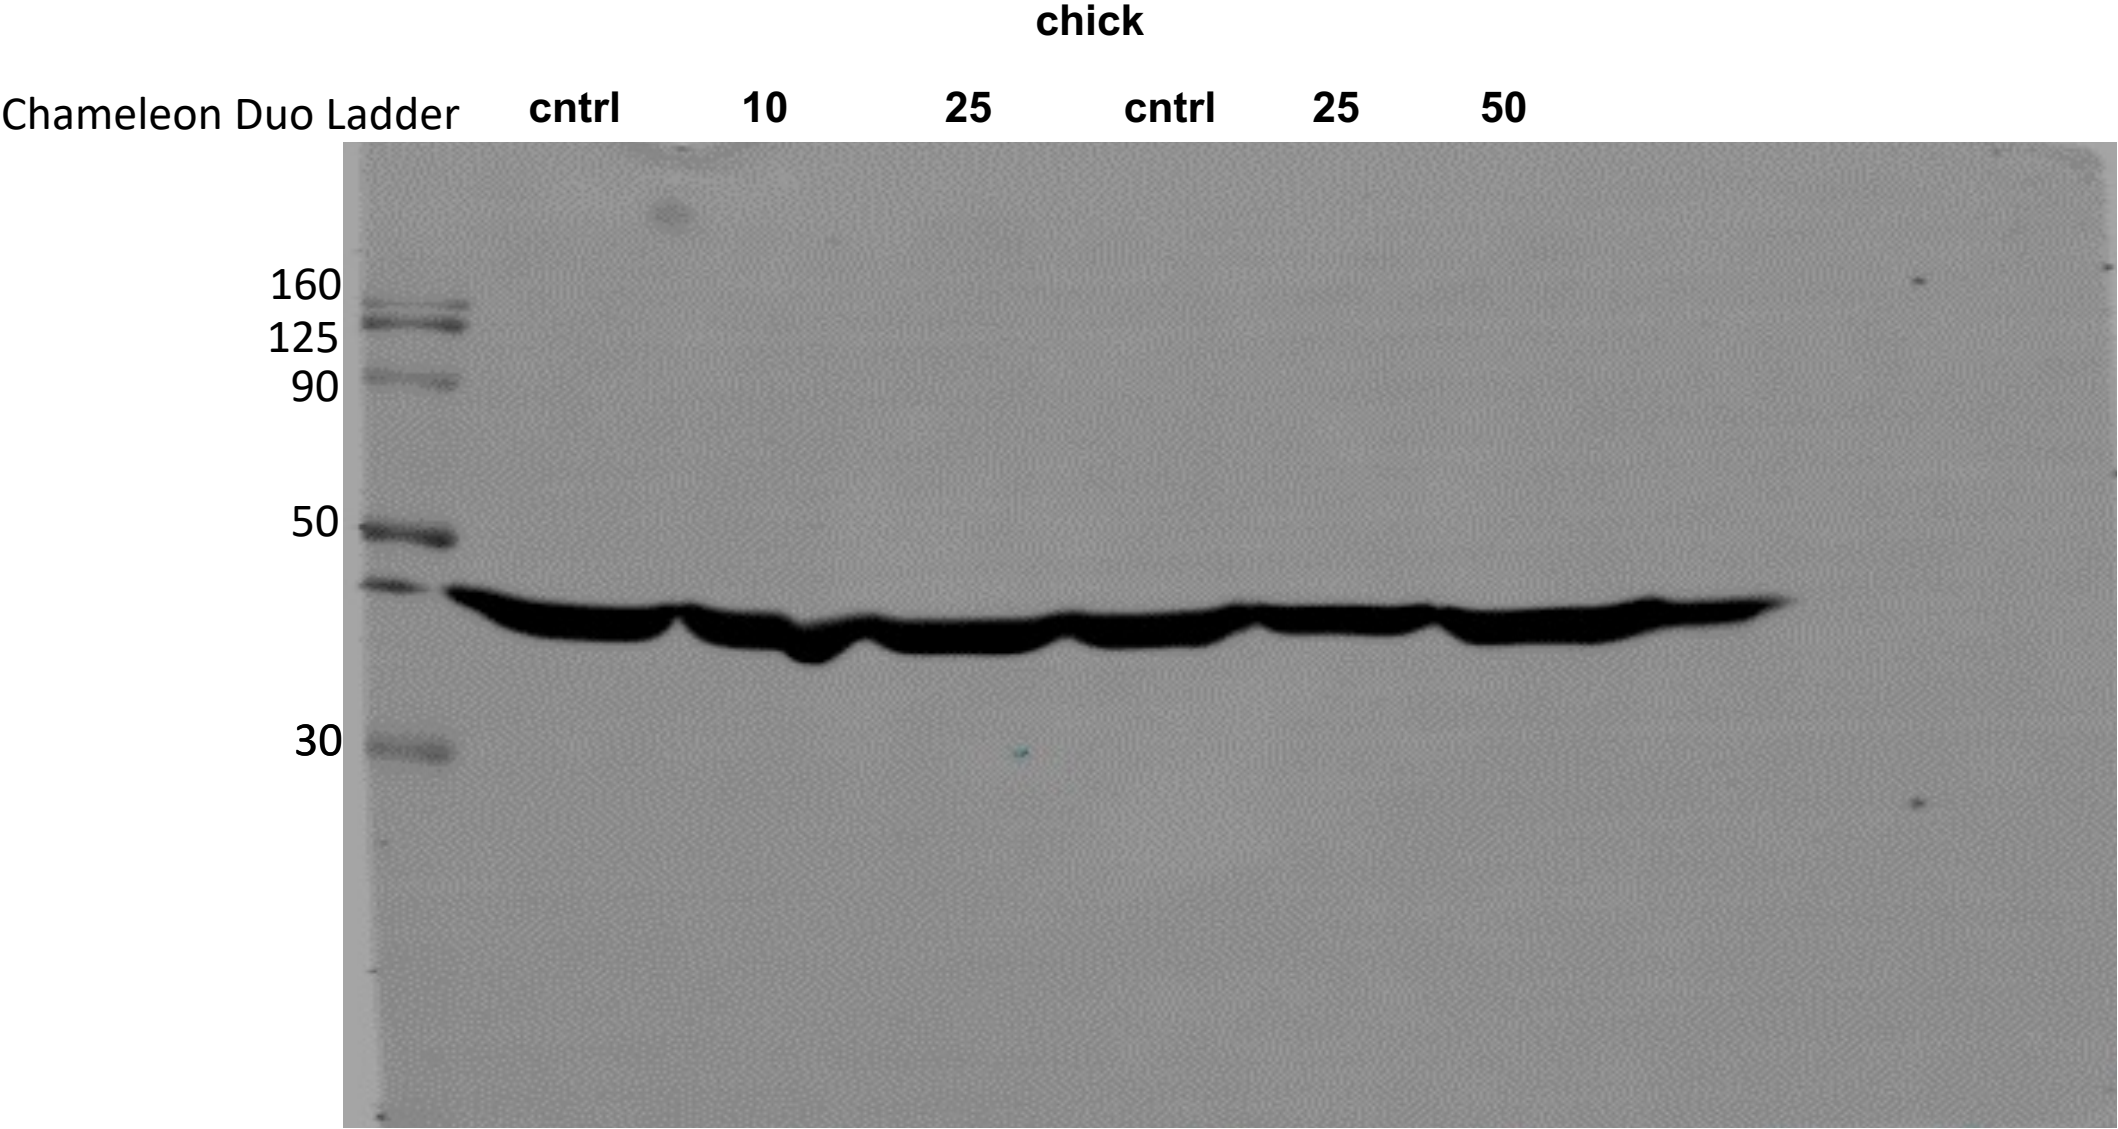

# Figure 4-figure supplement 1A-source data 1 (pSMAD)

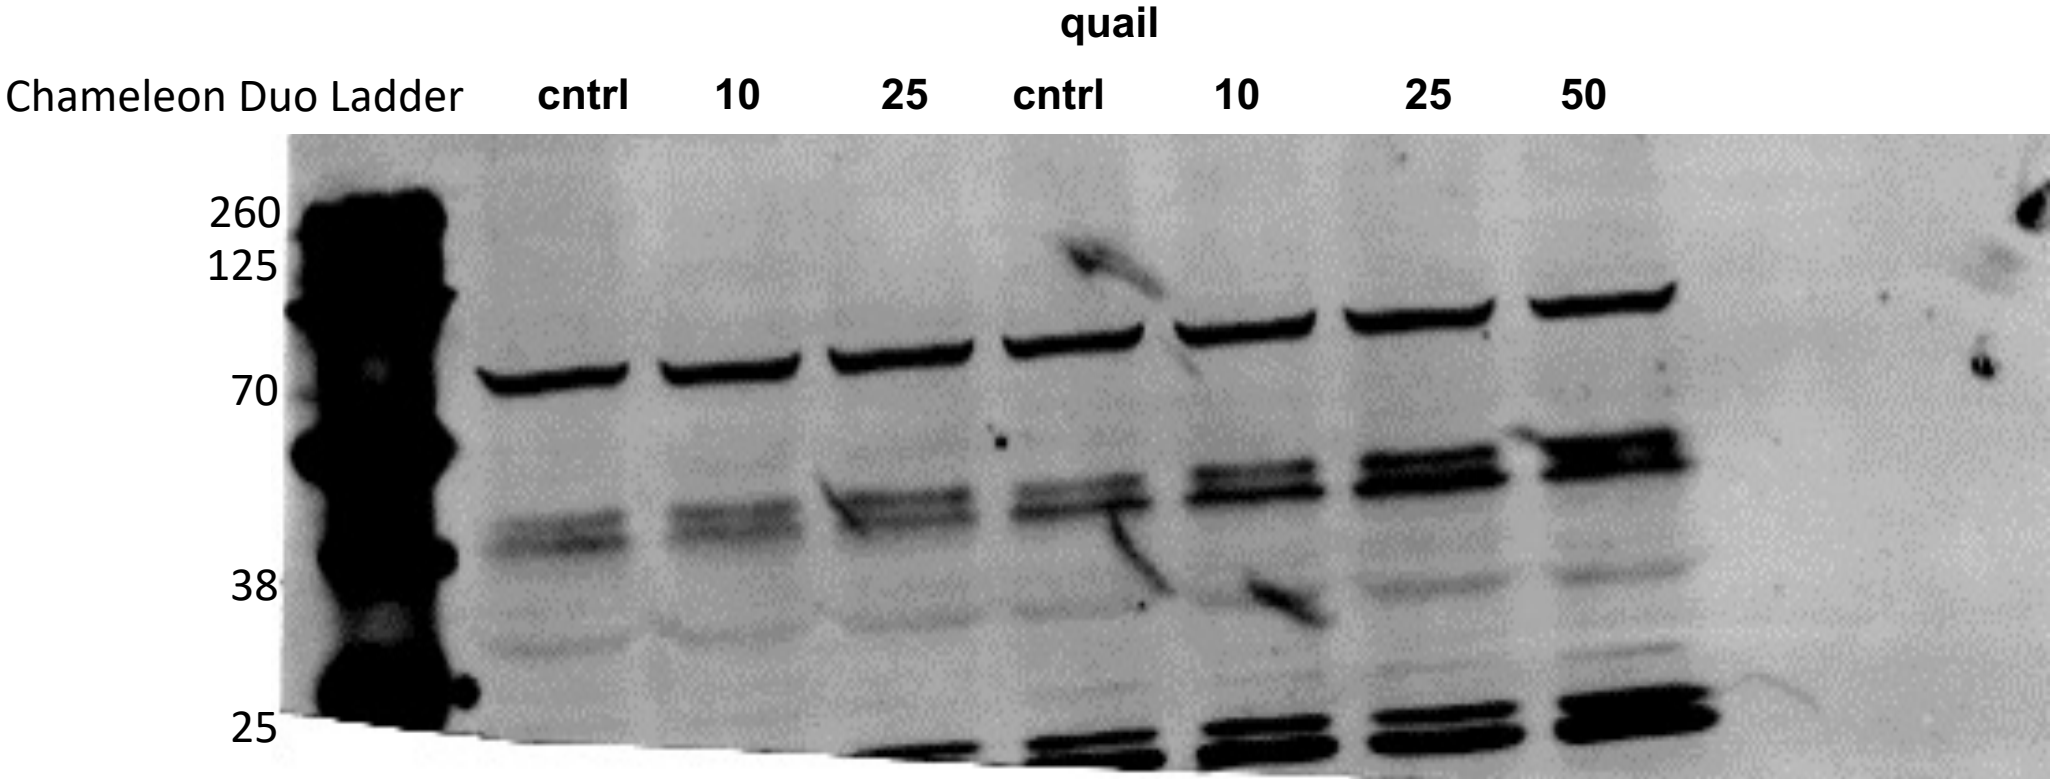

# Figure 4-figure supplement 1A-source data 1 ( $\beta$ -Actin)

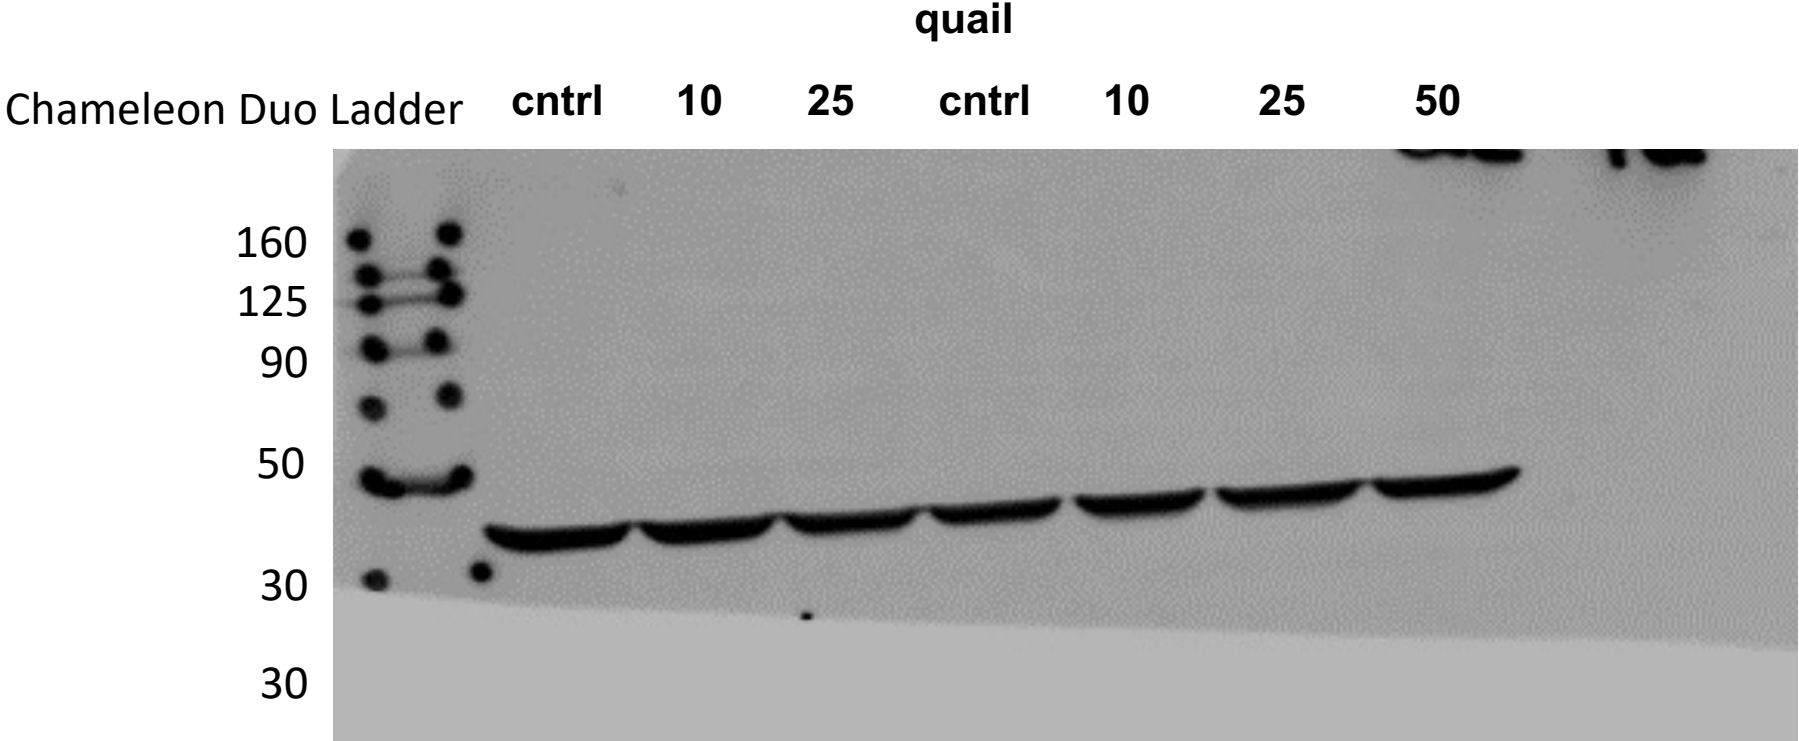

# Figure 4-figure supplement 1A-source data 1 (pSMAD)

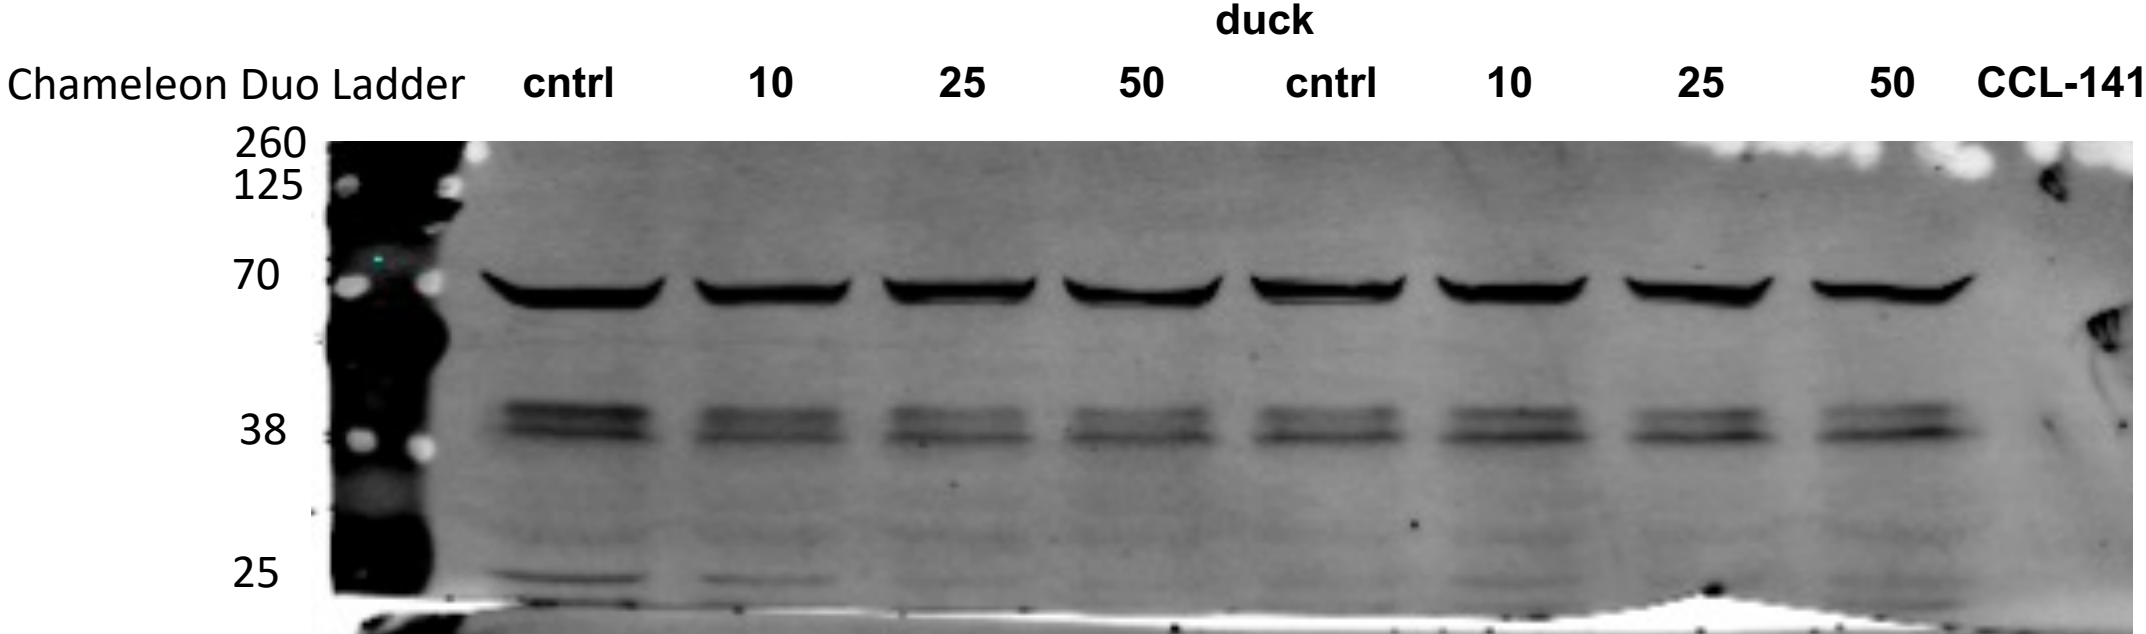

# Figure 4-figure supplement 1A-source data 1 ( $\beta$ -Actin)

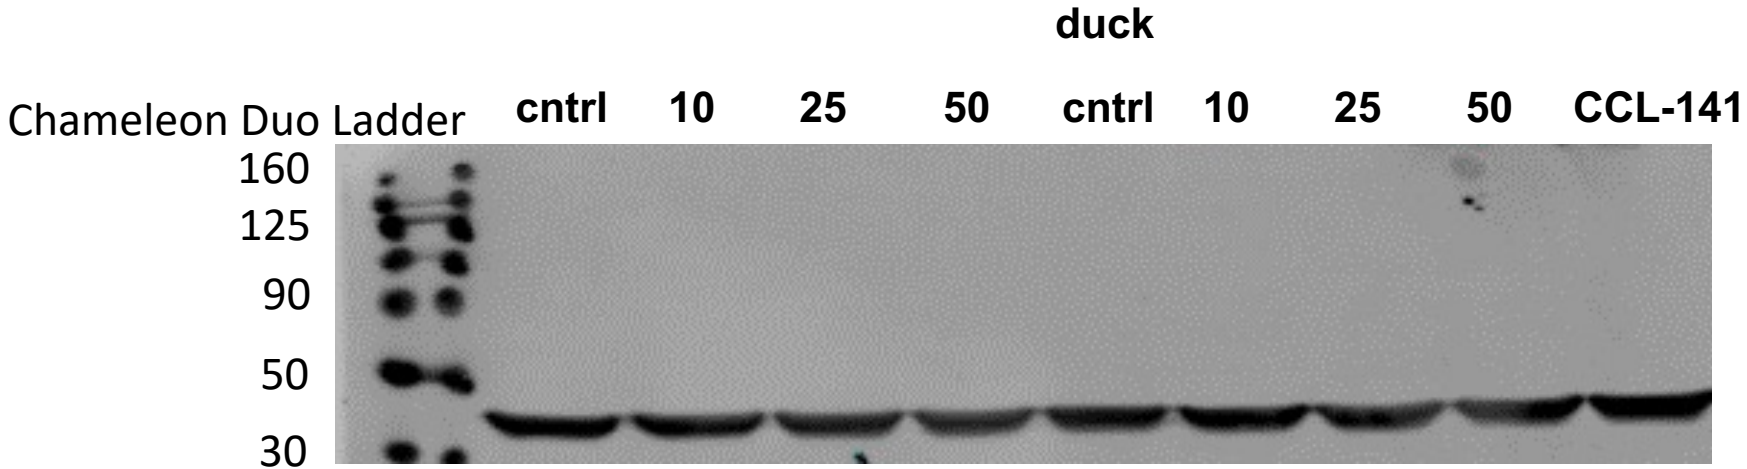

Supplement: fig4-figsupp1-data1 [file elife-66005-fig4-figsupp1-data1-v2.pdf]
