# Supplementary material for: Species-specific sensitivity to TGFβ signaling and changes to the Mmp13 promoter underlie avian jaw development and evolution
Source: eLife journal article supplement (doi:10.7554/elife.66005), 2022-06-06

control (empty vector)

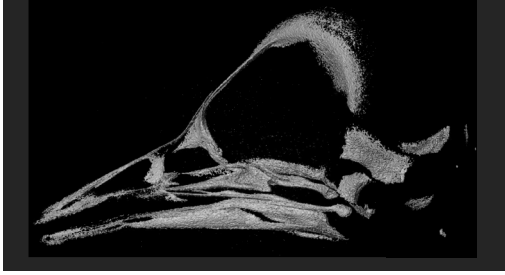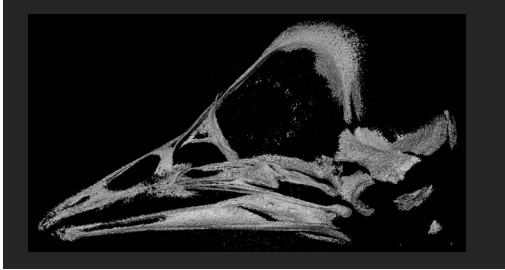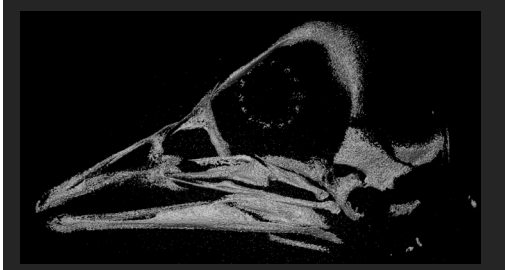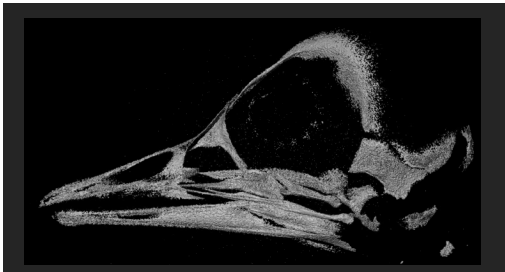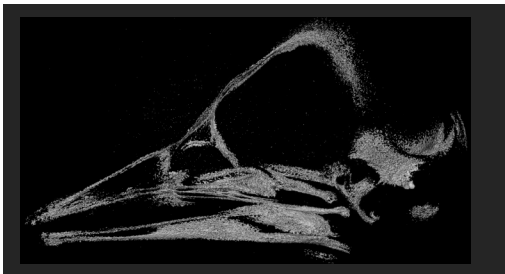

treated (*Mmp13* overexpression)

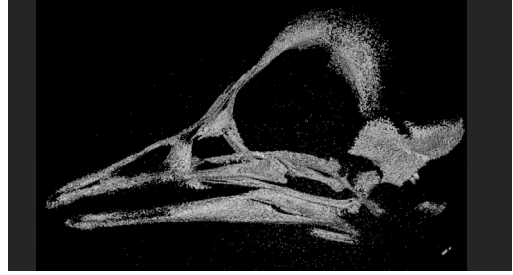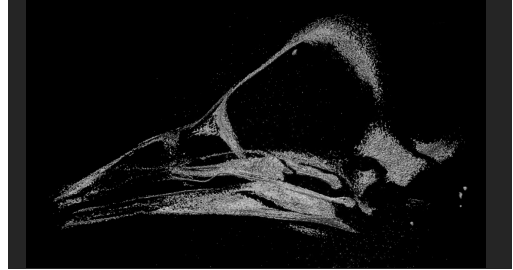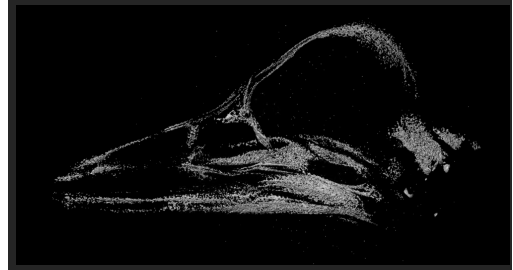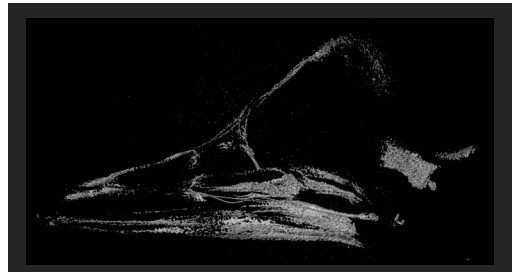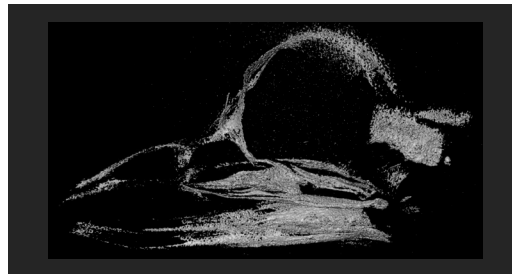

Supplement: fig5-data2 [file elife-66005-fig5-data2-v2.pdf]
